1 **Phylogenomic data reveal hard polytomies across the backbone of the large genus *Solanum***  
2 **(Solanaceae)**

3 Gagnon, Edeline<sup>1,2</sup>; Hilgenhof, Rebecca<sup>1,2</sup>; Orejuela, Andrés<sup>1,2</sup>; McDonnell, Angela<sup>3</sup>;  
4 Sablok, Gaurav<sup>4,5</sup> Aubriot, Xavier<sup>6</sup>; Giacomini, Leandro<sup>7</sup>; Gouvêa, Yuri<sup>8</sup>; Bohs, Lynn<sup>9</sup>;  
5 Dodsworth, Steven<sup>10,11</sup>; Martine, Christopher<sup>12</sup>; Poczai, Péter<sup>4,13</sup>; Knapp, Sandra<sup>14</sup>; Särkinen,  
6 Tiina<sup>1</sup>.

7  
8 <sup>1</sup>*Royal Botanic Garden Edinburgh, 20A Inverleith Row, Edinburgh, EH3 5LR, UK*

9 <sup>2</sup>*School of Biological Sciences, University of Edinburgh, King's*  
10 *Buildings, Mayfield Road, Edinburgh, EH9 3JH, UK*

11 <sup>3</sup>*Negaunee Institute for Plant Conservation Science and Action, Chicago Botanic Garden, 1000*  
12 *Lake Cook Rd, Glencoe, IL 60022, USA*

13 <sup>4</sup>*Finnish Museum of Natural History (Botany Unit), University of Helsinki, PO Box 7 FI-00014*  
14 *Helsinki, Finland*

15 <sup>5</sup>*Organismal and Evolutionary Biology Research Programme (OEB), Viikki Plant Science*  
16 *Centre (ViPS), PO Box 65, FI-00014 University of Helsinki, Finland*

17 <sup>6</sup>*Université Paris-Saclay, CNRS, AgroParisTech, Ecologie Systématique et Evolution, 91405,*  
18 *Orsay, France*

19 <sup>7</sup>*Instituto de Ciências e Tecnologia das Águas & Herbário HSTM, Universidade Federal do*  
20 *Oeste do Pará, Rua Vera Paz, sn, Santarém, CEP 68040-255, PA, Brazil*

21 <sup>8</sup>*Departamento de Botânica, Instituto de Ciências Biológicas, Universidade Federal de Minas*  
22 *Gerais – UFMG, Av. Antônio Carlos, 6627, Pampulha, Belo Horizonte, CEP 31270-901, MG,*  
23 *Brazil*

GAGNON ET AL.

24 <sup>9</sup>*Department of Biology, University of Utah, Salt Lake City, UT, USA*

25 <sup>10</sup>*School of Life Sciences, University of Bedfordshire, University Square, Luton LU1 3JU, UK*

26 <sup>11</sup>*Royal Botanic Gardens, Kew, Richmond TW9 3AE, Surrey, UK*

27 <sup>12</sup>*Department of Biology, Bucknell University, Lewisburg, PA 17837, USA*

28 <sup>13</sup>*Faculty of Environmental and Biological Sciences, University of Helsinki, FI-00014 Finland*

29 <sup>14</sup>*Department of Life Sciences, Natural History Museum, Cromwell Road, London SW7 5BD,*

30 *UK.*

31 Corresponding author: Edeline Gagnon, [edeline.gagnon@gmail.com](mailto:edeline.gagnon@gmail.com)

## SOLANUM PHYLOGENOMICS

### 32 ABSTRACT

33           Increased volumes of phylogenomic data have revealed incongruent topologies in gene  
34 trees, both between and within genomes across many organisms. Some of these incongruences  
35 indicate polytomies that may remain impossible to resolve. Here, widespread gene-tree  
36 discordance is uncovered along the backbone of *Solanum*, one of the largest flowering plant  
37 genera that includes the cultivated potato, tomato, and eggplant, as well as 24 minor crop plants.  
38 First, a densely sampled species-level phylogeny of *Solanum* is built using unpublished and  
39 publicly available Sanger sequences comprising 60% of all accepted species (742 spp.) and nine  
40 regions (ITS, *waxy*, and seven plastid markers). The robustness of the Sanger-based topology is  
41 tested by examining a plastome dataset with 140 species and a nuclear target-capture dataset with  
42 39 species of *Solanum*. Clear incongruences between species trees generated from the  
43 supermatrix, plastome, and nuclear target-capture datasets are revealed. Discordance within the  
44 plastome and target-capture dataset are found at different evolutionary depths in three different  
45 areas along the backbone of these phylogenetic trees, with polytomy tests suggesting that most of  
46 these nodes have short branches and should be collapsed. We argue that incomplete lineage  
47 sorting due to rapid diversification is the most likely cause behind these polytomies, and that  
48 embracing the uncertainty that underlies them is crucial to depict the evolution of large and  
49 rapidly radiating lineages.

### 50 Keywords

51 Phylogenomic discordance, incongruence, hard polytomies, Solanaceae, *Solanum*, incomplete  
52 lineage sorting, supertree network

53

54 INTRODUCTION

55           Recent advances in high-throughput sequencing have provided larger molecular datasets,  
56 including entire genomes, for reconstructing evolutionary relationships (e.g., Ronco et al. 2021).  
57 In botany, considerable progress has been made since the publication of the first molecular-based  
58 classification of orders and families (APG 1998), with one of the most recent examples including  
59 a phylogenetic tree of the entire Viridiplantae based on transcriptome data from more than a  
60 thousand species (1KP 2019). Whilst large datasets have strengthened our understanding of  
61 evolutionary relationships and classifications across the Tree of Life, several of them have  
62 demonstrated repeated cases of persistent topological discordance across key nodes in birds (Suh  
63 et al. 2015; Suh 2016), mammals (Simion et al. 2017; Morgan et al. 2013; Romiguier et al.  
64 2013), amphibians (Hime et al. 2021), plants (Wickett et al. 2014; 1KP 2019), and fungi  
65 (Kuramae et al. 2006).

66           Much debate surrounds whether persistent topological incongruences can be resolved  
67 with more data or whether they represent so-called hard polytomies that reflect complex  
68 biological realities due to non-bifurcating evolution (Jeffroy et al. 2006; Philippe et al. 2011).  
69 Discordance in phylogenetic signal can be due to three general classes of effects (Wendel and  
70 Doyle 1998): (1) technical causes such as gene choice, sequencing error, model selection or poor  
71 taxonomic sampling (Philippe et al. 2011; Philippe 2017); (2) organism-level processes such as  
72 rapid or convergent evolution, rapid diversification, incomplete lineage sorting (ILS), or  
73 horizontal gene transfer (Degnan and Rosenberg 2009) and (3) gene and genome-level processes  
74 such as interlocus interactions and concerted evolution, intragenic recombination, use of  
75 paralogous genes for analysis, and/or non-independence of sites used for analysis. Together,  
76 these biological and non-biological processes can lead to conflicting phylogenetic signals at

## SOLANUM PHYLOGENOMICS

77 different loci in the genome and hinder the recovery of the evolutionary history of a group  
78 (Degnan and Rosenberg 2009). Consequently, careful assessment of phylogenetic discordance  
79 across mitochondrial, plastid, and nuclear datasets is critical for understanding realistic  
80 evolutionary patterns in a group, as traditional statistical branch support measures fail to reflect  
81 topological variation of the gene trees underlying a species tree (Liu et al. 2009; Kumar et al.  
82 2012).

83         Here we explore the presence of topological incongruence in nuclear and plastome  
84 datasets of the large and economically important angiosperm genus *Solanum* L., which includes  
85 1,228 accepted species and several major crops and their wild relatives, including potato, tomato  
86 and brinjal eggplant (aubergine), as well as at least 24 minor crop species. Building a robust  
87 species-level phylogeny for this genus has not only been challenging because of the sheer size of  
88 the genus, but also because of persistent poorly resolved nodes along the phylogenetic backbone.  
89 Bohs (2005) published the first plastid phylogenetic analysis for *Solanum* and established a set of  
90 12 highly supported clades based on her strategic sampling of 112 (9%) species, spanning  
91 morphological and geographic variation. As new studies have emerged with increased taxonomic  
92 and genetic sampling (e.g., Levin et al. 2006; Weese and Bohs 2007; Stern et al. 2011; Särkinen  
93 et al. 2013; Tepe et al. 2016), the understanding of the overall phylogenetic relationships within  
94 *Solanum* has evolved to recognise three main clades: (1) Thelopodium Clade containing three  
95 species sister to the rest of the genus, (2) Clade I containing c. 350 mostly herbaceous and non-  
96 spiny species (including the Tomato, Petota, and Basarthrum clades that contain the cultivated  
97 tomato, potato, and pepino, respectively), and (3) Clade II consisting of c. 900 predominantly  
98 spiny and shrubby species, including the cultivated brinjal eggplant (Table 1). The two latter  
99 clades are further resolved into 10 major and 43 minor clades (Table 1).

100           Despite the establishment of the relatively robust major and minor clades, phylogenetic  
101 relationships between many of these clades of *Solanum* have remained poorly resolved, mainly  
102 due to limitations in taxon and molecular marker sampling. The most recent genus-wide  
103 phylogenetic study by Särkinen et al. (2013) was based on seven markers (two nuclear and 5  
104 plastid) and included fewer than half (34%) of the species of *Solanum*. It failed to resolve the  
105 relationships between major and minor clades, especially within Clade II and the large  
106 component Leptostemonum Clade. A more robust, well-resolved, and densely sampled  
107 phylogeny of *Solanum* is needed to study the morphological, chemical, and genetic variation in  
108 this mega-diverse group, particularly for those interested in using wild species traits in plant  
109 breeding (Hardigan et al. 2016; Li et al. 2018; Smith et al. 2020).

110           To check whether significant increases in taxonomic and molecular sampling are key to  
111 phylogenetic improvements in *Solanum*, we explored phylogenetic relationships across this  
112 mega-diverse genus using plastid (PL) and nuclear target-capture (TC) phylogenomic datasets as  
113 well as a Sanger sequence dataset including 60% of species. We ask: (1) Does increased gene  
114 sampling of plastome and nuclear data resolve previously identified polytomies between major  
115 and minor clades?; (2) Is there evidence of discordance between genomic datasets?; (3) Within  
116 genomic datasets, do high branch support also show high gene concordance?; (4) Are areas of  
117 high discordance in the *Solanum* phylogeny better explained by polytomies rather than  
118 bifurcating nodes? Discordance analyses and comparison of branch support values across the 48  
119 species trees built from the two phylogenomic datasets and the Sanger sequence supermatrix  
120 show phylogenetic discordance both within and between genomic datasets. Polytoomy tests and  
121 filtered supertree networks indicate that the discordance is due to the presence of hard  
122 polytomies in at least three places. The hard polytomies are likely due to rapid speciation and

## SOLANUM PHYLOGENOMICS

123 diversification coupled with ILS and we suggest that they represent an important aspect of the  
124 biology and evolution of the genus.

125

### 126 MATERIALS AND METHODS

#### 127 *Taxon Sampling*

128 A Sanger sequence supermatrix included all available sequences from GenBank for nine  
129 regions, including the nuclear ribosomal internal transcribed spacer (ITS), low-copy nuclear  
130 region *waxy* (i.e., GBSSI), two protein-coding plastid genes *matK* and *ndhF*, and five non-coding  
131 plastid regions (*ndhF-rpl32*, *psbA-trnH*, *rpl32-trnL*, *trnS-G*, and *trnT-L*). GenBank results were  
132 blasted against target regions in USEARCH v.11 (Edgar 2010). Only vouchered and verified  
133 samples were kept. Taxon names were checked against SolanaceaeSource synonymy  
134 (solanaceaesource.org, Nov. 2020) and species that were duplicated were pruned out. A total of  
135 817 Sanger sequences were generated and added to the matrix, adding 129 previously unsampled  
136 species and new data for 257 species (Table S1). Final species sampling across major and minor  
137 clades of *Solanum* varied from 13-100%, with 742 species of *Solanum* (60% of the 1,228  
138 currently accepted species, Nov 2020; Table 1). Four taxa of *Jaltomata* Schltldl. were used as an  
139 outgroup (Table S1).

140 To assess discordance in the overall phylogeny of *Solanum*, a set of species was selected  
141 for the phylogenomic study to represent all 10 major and as many of the 43 minor clades of  
142 *Solanum* as possible (Table 1), as well as the outgroup *Jaltomata*. The final sampling included  
143 151 samples for the PL dataset (140 *Solanum* species; Table 1, S2) and 40 samples for the TC  
144 dataset (39 *Solanum* species; Table 1, S3). For the PL dataset, 86 samples were sequenced using  
145 low-coverage genome skimming, and the remaining samples downloaded from GenBank (Nov

146 2019). For the TC dataset, 12 samples were sequenced as part of the Plant and Fungal Trees of  
147 Life project (PAFTOL; [paftol.org](http://paftol.org)) using the Angiosperms353 bait set (Johnson et al. 2019) and  
148 17 sequences were added from an unpublished dataset provided by A. McDonnell and C.  
149 Martine. Sequences for the remaining 12 samples were extracted from the GenBank SRA archive  
150 using the SRA Toolkit 2.10.7 (<https://github.com/ncbi/sra-tools>; Table S3).

### 151 *DNA Extraction, Library Preparation & Sequencing*

152 DNA extraction, library preparation, and sequencing of both Sanger sequence and  
153 phylogenomic datasets followed established protocols. Full methods are available in  
154 Supplementary Material and Methods.

### 155 *Phylogenetic Analyses*

156 *Testing the effect of methodological choices.* – A total of 48 phylogenetic analyses were  
157 run using different methodological strategies to test their effect on tree topologies (Fig. 1a)  
158 because the choice of phylogenetic method, taxon sampling, missing data, data inclusion, and  
159 partitioning strategy can lead to topological discordance (e.g., Philippe et al. 2011, 2017; Saarela  
160 et al. 2018; Duvall et al. 2020; Gonçalves et al. 2020). Both Maximum Likelihood (ML) and  
161 Bayesian Inference (BI) were performed on Sanger sequence matrices (see Supplementary  
162 Material and Methods for details). Analyses were run on all nine loci individually, on the  
163 combined plastid dataset (seven loci), and on the final combined matrix. The ML and BI species  
164 trees from the final combined matrix, with their more complete taxonomic sampling, were used  
165 as a reference to compare results from the PL and TC species trees generated below.

166



SOLANUM PHYLOGENOMICS

167 **TABLE 1.** Number of species and taxon sampling across major and minor clades of *Solanum*.  
 168 Clades are based on groups identified in previous molecular phylogenetic studies (Bohs 2005;  
 169 Weese and Bohs 2007; Stern et al. 2011; Stern and Bohs 2012; Särkinen et al. 2013; Tepe et al.  
 170 2016). Species number for each clade is based on current updated taxonomy in the  
 171 SolanaceaeSource database. The 19 clades sampled in the pruned trees for the principal  
 172 coordinate analysis in this study are in bold. New associated major clade names are given where  
 173 applicable. Lines shaded in gray represent major and minor clades belonging to Clade II.

| Minor clade                    | Associated major clade (Särkinen et al. 2013) | New associated major clade (This study) | Species    | Sampled species (%) |                 |                     |
|--------------------------------|-----------------------------------------------|-----------------------------------------|------------|---------------------|-----------------|---------------------|
|                                |                                               |                                         |            | Super-matrix        | Plastome (PL)   | Target Capture (TC) |
| <b>Thelopodium</b>             | <b>Thelopodium</b>                            |                                         | <b>3</b>   | <b>3 (100%)</b>     | <b>1 (33%)</b>  | <b>1 (33%)</b>      |
| African non-spiny              | M Clade                                       | VANAns                                  | 14         | 5 (36%)             | 1 (7%)          | -                   |
| <b>Normania</b>                | <b>M Clade</b>                                | <b>VANAns</b>                           | <b>3</b>   | <b>2 (67%)</b>      | <b>1 (33%)</b>  | <b>1 (33%)</b>      |
| <b>Archaeosolanum</b>          | <b>M Clade</b>                                | <b>VANAns</b>                           | <b>8</b>   | <b>8 (100%)</b>     | <b>1 (13%)</b>  | <b>1 (13%)</b>      |
| <b>Valdiviense</b>             | <b>M Clade</b>                                | <b>VANAns</b>                           | <b>1</b>   | <b>1 (100%)</b>     | <b>1 (100%)</b> | <b>1 (100%)</b>     |
| <b>Dulcamaroid</b>             | <b>M Clade</b>                                | <b>DulMo</b>                            | <b>45</b>  | <b>25 (56%)</b>     | <b>8 (18%)</b>  | <b>1 (2%)</b>       |
| <b>Morelloid</b>               | <b>M Clade</b>                                | <b>DulMo</b>                            | <b>75</b>  | <b>66 (88%)</b>     | <b>15 (20%)</b> | <b>1 (1%)</b>       |
| <b>Regmandra</b>               | <b>Potato</b>                                 | <b>Regmandra</b>                        | <b>12</b>  | <b>6 (50%)</b>      | <b>4 (33%)</b>  | <b>1 (8%)</b>       |
| Herpystichum                   | Potato                                        |                                         | 10         | 10 (100%)           | -               | -                   |
| Pteroidea                      | Potato                                        |                                         | 10         | 10 (100%)           | 1 (10%)         | -                   |
| Oxycoccoides                   | Potato                                        |                                         | 1          | 1 (100%)            | -               | -                   |
| Articulatum                    | Potato                                        |                                         | 2          | 2 (100%)            | -               | -                   |
| <b>Basarthrum</b>              | <b>Potato</b>                                 |                                         | <b>16</b>  | <b>10 (56%)</b>     | <b>3 (19%)</b>  | <b>3 (19%)</b>      |
| Anarrichomenum                 | Potato                                        |                                         | 12         | 8 (82%)             |                 |                     |
| <b>Etuberosum</b>              | <b>Potato</b>                                 |                                         | <b>3</b>   | <b>2 (67%)</b>      | <b>2 (67%)</b>  | <b>1 (33%)</b>      |
| <b>Tomato</b>                  | <b>Potato</b>                                 |                                         | <b>7</b>   | <b>14 (82%)</b>     | <b>8 (47%)</b>  | <b>3 (18%)</b>      |
| <b>Petota</b>                  | <b>Potato</b>                                 |                                         | <b>113</b> | <b>61 (54%)</b>     | <b>38 (34%)</b> | <b>2 (2%)</b>       |
| <b>Clandestinum-Mapiriense</b> | <b>Clandestinum-Mapiriense</b>                |                                         | <b>3</b>   | <b>3 (100%)</b>     | <b>1 (33%)</b>  | <b>1 (33%)</b>      |
| <b>Wendlandii-Allophyllum</b>  | <b>Wendlandii-Allophyllum</b>                 |                                         | <b>10</b>  | <b>7 (70%)</b>      | <b>1 (10%)</b>  | <b>1 (10%)</b>      |
| Nemorensis                     | Nemorensis                                    |                                         | 4          | 4 (100%)            | 1 (25%)         | -                   |

GAGNON ET AL.

|                        |                      |              |                  |                  |                |
|------------------------|----------------------|--------------|------------------|------------------|----------------|
| Pachyphylla            | Cyphomandra          | 39           | 32 (82%)         | 1 (3%)           | -              |
| Cyphomandropsis        | Cyphomandra          | 11           | 7 (64%)          | 1 (9%)           | 1 (9%)         |
| <b>Geminata</b>        | <b>Geminata</b>      | <b>150</b>   | <b>68 (45%)</b>  | <b>5 (3%)</b>    | <b>1 (1%)</b>  |
| Reductum               | Geminata             | 2            | 2 (100%)         | 1 (50%)          | -              |
| Brevantherum           | Brevantherum         | 83           | 29 (35%)         | 3 (4%)           | -              |
| Gonatotrichum          | Brevantherum         | 7            | 7 (100%)         | 1 (14%)          | -              |
| Inornatum              | Brevantherum         | 5            | 2 (40%)          | 1 (20%)          | -              |
| Trachytrichium         | Brevantherum         | 2            | 2 (100%)         | -                | -              |
| <b>Elaeagniifolium</b> | <b>Leptostemonum</b> | <b>5</b>     | <b>5 (100%)</b>  | <b>1 (20%)</b>   | <b>1 (20%)</b> |
| Micracantha            | Leptostemonum        | 14           | 9 (64%)          | 1 (7%)           | -              |
| <b>Torva</b>           | <b>Leptostemonum</b> | <b>54</b>    | <b>34 (63%)</b>  | <b>5 (9%)</b>    | <b>1 (2%)</b>  |
| Erythrotrichum         | Leptostemonum        | 33           | 13 (39%)         | 1 (3%)           | -              |
| Thomasiifolium         | Leptostemonum        | 9            | 4 (44%)          | 1 (11%)          | -              |
| Gardneri               | Leptostemonum        | 10           | 8 (80%)          | 1 (10%)          | -              |
| <b>Acanthophora</b>    | <b>Leptostemonum</b> | <b>22</b>    | <b>13 (59%)</b>  | <b>1 (5%)</b>    | -              |
| Lasiocarpa             | Leptostemonum        | 12           | 12 (100%)        | -                | -              |
| <b>Sisymbriifolium</b> | <b>Leptostemonum</b> | <b>4</b>     | <b>4 (100%)</b>  | <b>1 (25%)</b>   | <b>1 (25%)</b> |
| Androceras             | Leptostemonum        | 16           | 15 (94%)         | -                | -              |
| Crinitum               | Leptostemonum        | 23           | 10 (43%)         | -                | -              |
| Bahamense              | Leptostemonum        | 3            | 3 (100%)         | -                | -              |
| Asterophorum           | Leptostemonum        | 4            | 2 (50%)          | -                | -              |
| Carolinense            | Leptostemonum        | 11           | 8 (73%)          | 1 (9%)           | -              |
| Hieronymi              | Leptostemonum        | 1            | 1 (100%)         | 1 (100%)         | -              |
| <b>Old World</b>       | <b>Leptostemonum</b> | <b>332</b>   | <b>197 (59%)</b> | <b>24 (7%)</b>   | <b>16 (5%)</b> |
| Campechiense           | Leptostemonum        | 1            | 1 (100%)         | -                | -              |
| Crotonoides            | Leptostemonum        | 3            | 2 (67%)          | 1 (33%)          | -              |
| Multispinum            | Leptostemonum        | 1            | 1 (100%)         | 1 (100%)         | -              |
| Unplaced               | Leptostemonum        | 9            | 1 (13%)          | -                | -              |
| <b>TOTAL:</b>          |                      | <b>1,228</b> | <b>746 (60%)</b> | <b>140 (11%)</b> | <b>39 (3%)</b> |

174

175

## SOLANUM PHYLOGENOMICS

176 Additional analyses were run on the two phylogenomic datasets; 40 on the PL and six on  
177 the TC datasets (Fig. 1a). The effect of phylogenetic method on tree topologies was tested by  
178 comparing topologies from ML (IQ-TREE 2; Minh et al. 2020a) and two coalescent methods  
179 (ASTRAL-III v.5.7.3, Zhang et al. 2018; and SVDquartets, Chifman and Kubatko 2014; Fig. 1a).  
180 The two coalescent methods have been shown to perform differently under different levels of  
181 ILS (Chou et al. 2015). In addition, the effect of missing data (i.e., data quality) was tested using  
182 complete (125 samples) versus partial plastid genomes (151 samples; Fig. 1a; Table S4). Each of  
183 the two matrices was analysed using different parts of the plastid genome (i.e., data type; Fig.  
184 1a): (1) all regions; (2) exons only; (3) introns only; and (4) intergenic regions only. Finally, the  
185 effect of partitioning scheme amongst loci was tested with the PL dataset using three different  
186 methods (Fig. 1a): (1) no partition; (2) partition by loci; and (3) best-fit partition scheme. For the  
187 TC dataset, the effect of data quality (i.e., missing data) was tested using three different  
188 thresholds of the minimum number of recovered target genes (min 20, 10, and 4; Fig. 1a), using  
189 HybPiper (Johnson et al. 2016). ML (IQ-TREE2) and coalescent trees (ASTRAL-III) were  
190 generated for each of these datasets resulting in 6 species trees (Fig. 1a). Full methods of  
191 plastome and target capture assembly, and the phylogenetic methods used to generate the 48  
192 species trees from all three datasets are indicated in Supplementary Material and Methods.

### 193 *Discordance Analyses*

194 *Principal Coordinate Analysis.* – Phylogenomic discordance within and between datasets  
195 was assessed by comparing branch support values across the 48 species trees generated from the  
196 supermatrix, PL, and TC datasets. To compare topological differences, Principal Coordinates  
197 Analyses (PCoA) of species tree distances were carried out and visualised using the package  
198 “Treespace” (Jombart et al. 2017), adapting an R script from Gonçalves et al. (2019b). Distances

199 were measured between unrooted (Robinson and Foulds 1981) and rooted topologies (Kendall  
200 and Colijn 2016). To enable comparison, all 48 species trees were pruned to 27 taxa representing  
201 19 minor clades of *Solanum* (Table 1). The species sampled in the PL and TC datasets were  
202 identical for all except three minor clades, in which different closely related species were  
203 sequenced (Acanthophora: *S. viarum* Dunal/*S. capsicoides* All.; Morelloid: *S. opacum* A.Braun  
204 & C.D.Bouché/*S. americanum* Mill.; Elaeagnifolium: *S. mortonii* Hunz./*S. elaeagnifolium* Cav.).

205 *Concordance factors.* – Phylogenomic discordance within the PL and TC datasets was  
206 measured using gene concordance factors (gCF) and site concordance factors (sCF) calculated in  
207 IQ-TREE 2 (Minh et al. 2020b). These metrics assess the proportion of gene trees that are  
208 concordant with different nodes along the phylogenetic tree and the number of informative sites  
209 supporting alternative topologies. Low gCF values can result from either limited information  
210 (i.e., short branches) or genuine conflicting signal; low sCF values ~30% indicate lack of  
211 phylogenetic information in loci (Minh et al. 2020b). The metrics were calculated using the  
212 ASTRAL-III topologies with 151 (PL) and 40 (TC) tips, where the PL topology was pruned to  
213 43 tips to facilitate comparison, including the same 40 tips as the TC analysis with  
214 representatives of three minor clades not sampled in the TC phylogeny.

215 *Network analyses and polytomy tests.*– The presence of polytomies was explored by  
216 generating filtered supertree networks in SplitsTree 4 (Huson & Bryant 2006). Networks were  
217 generated based on the 160 gene trees used for the PL dataset and the 303 gene trees from the TC  
218 filtered to a minimum of 20 taxa per loci, with the minimum number of trees set to 50% of each  
219 dataset (80 and 151 trees respectively). The PL network was pruned as described above to  
220 facilitate comparison with the TC networks. Polytomy tests were carried out in ASTRAL-III  
221 following Sayyari and Mirarab (2018). Gene trees were used to infer quartet frequencies for all



229 datasets, and distribution of all resulting 48 phylogenetic trees in Principal Coordinates Analyses  
230 (PcoA) space based on distances between **b**) unrooted (Robinson-Foulds) and **c**) rooted trees  
231 (Kendall-Colijn). Colours and symbols reflect three main datasets used in the study: Supermatrix  
232 (yellow-brown diamonds), PL (blue circles and squares), and TC (grey triangles). Different  
233 phylogenetic methods are shown in different shades for supermatrix and TC analysis. For PL  
234 analyses, different partition schemes analysed using Maximum Likelihood (IQ-TREE) are shown  
235 in blue circles (pale=no partition; middle=partition by loci; dark=best-fit scheme) and different  
236 coalescent methods in squares (pale=SVDquartets; dark=ASTRAL). Data quality and data  
237 source for PL and TC analyses is indicated using abbreviations: ex: exons; in: introns, it:  
238 intergenic, al: all plastome loci; 151: all plastomes, 125: full plastomes only; tc04: Min. 4 loci,  
239 tc10: Min. 10 loci, tc20: Min 20 loci.

## 240 RESULTS

### 241 *Phylogenetic Analyses*

242 *Congruent recovery of clades.* – All three datasets, including the supermatrix and the two  
243 phylogenomic datasets (PL and TC), recovered all previously recognized minor and major clades  
244 in *Solanum* (Fig. 2; Table S5); the only exception was the Mapiriense-Clandestinum minor  
245 Clade, which was found to be polyphyletic in the supermatrix phylogeny (only one species  
246 sampled in PL and TC phylogenies). The Potato Clade was strongly supported across all  
247 analyses (Fig. 2; Table S5), as was the Regmandra Clade in supermatrix and PL analyses (only  
248 one sample in TC phylogenies). Furthermore, all analyses recovered a clade here referred to as  
249 DulMo, that includes the Morelloid and the Dulcamaroid Clades as sister to each other (Fig. 2;  
250 Table S5). A new strongly supported clade, here referred to as VANAns Clade comprised of the

## SOLANUM PHYLOGENOMICS

251 Valdiviense, Archaesolanum, Normania, and the African non-spiny Clades, was found across all  
252 analyses (Fig. 2; Table S5).

253 Clade II was supported as monophyletic across all topologies (Fig. 2), with maximum  
254 branch support in 42 out of 48 species trees (Table S5). As for the relationships of clades within  
255 Clade II, while differences in sampling hamper thorough comparisons, there was no deep  
256 incongruence detected amongst topologies obtained with the supermatrix, PL, and TC datasets  
257 (Fig 2; Fig. S1-S9). Within Clade II, the large Leptostemonum Clade (the spiny solanums) was  
258 strongly supported in 46 of 48 analyses, with strong branch support in all cases (Fig. 2; Fig S1-  
259 S9; Table S5).

260 *Incongruent relationships amongst clades.* – In contrast to the results above, major  
261 incongruence between species trees was observed with respect to the relationships of the main  
262 clades identified above (Fig. 2a,c; Table S5). All analyses recovered the Thelopodium Clade as  
263 sister to the rest of *Solanum*, except for three PL topologies based on coalescent analyses  
264 (SVDquartets) and all three ML analyses of the TC dataset (Fig. 2; Table S5). While the  
265 supermatrix phylogeny supported the monophyly of the previously recognised Clade I that  
266 includes most non-spiny *Solanum* clades (Fig. 2b; Fig. S1-S2), the PL and TC trees resolved  
267 these clades as a grade relative to a monophyletic Clade II (Fig. 2a,c; Fig. S1-S9). This was in  
268 large part due to the unstable position of the Regmandra Clade, which was subtended by a  
269 particularly short branch and resolved in different positions along the backbone in all three  
270 datasets (Fig. 2, Fig. S1-S9, Table S5). For example, the supermatrix ML analysis recovered the  
271 Regmandra Clade as sister to the Potato Clade with moderate branch support (Fig. 2b), whereas  
272 the PL analyses in 39 out of 40 species trees resolved Regmandra either as sister to the M Clade,  
273 Clade II, or both with varying levels of support (21-100% branch support; Table S5). The ML

274 TC species trees resolved Regmandra as sister to the Potato Clade, DulMo, and Clade II (100%  
275 branch support; Table S5). While two of the PL ASTRAL analyses also recovered this topology,  
276 the third analysis resolved Regmandra as sister to the VANAns Clade; in all cases, branch  
277 support was only weak to moderate (67 to 82%; Table S5).

278 The previously identified M Clade composed of the VANAns and DulMo Clades was not  
279 supported by all analyses (Fig. 2, Table S5). While all PL ML analyses recovered the M Clade  
280 with high branch support (> 89%), support for this relationship was more variable in the  
281 ASTRAL and SVDquartets analyses (Table S5, Fig S5-7). The TC analyses never recovered the  
282 M Clade, but rather resolved the DulMo Clade as sister to the Potato Clade (100% branch  
283 support; Table S5, FigS8-S9). Furthermore, the VANAns Clade was recovered as sister to the  
284 rest of *Solanum* (excluding the first diverging lineage Thelopodium Clade) with moderate  
285 support in the TC ML analyses, and with low or no support in the TC ASTRAL analyses (Fig. 2,  
286 Table S5, Fig. S8-S9).

287 In all analyses, the Potato Clade was a clearly congruent and strongly supported clade,  
288 but its position within *Solanum* remains incongruent between datasets (Fig. 2); it was resolved as  
289 sister to the remaining *Solanum* in PL, sister to M Clade in supermatrix, and sister to DulMo  
290 Clade in the TC analyses (Fig. 2), with many more strongly supported positions suggested in  
291 other analyses (Table S5). Interestingly, the phylogenomic datasets also showed incongruent  
292 positions for the larger Petota Clade, where TC analyses resolved it as sister to the Etuberosum  
293 Clade, with maximum support in the ASTRAL analyses, and moderate to low support in the ML  
294 analyses (72-86%). In contrast, PL analyses placed it as sister to the Tomato Clade, albeit with  
295 branch support values under 85% in 4/8 of the ASTRAL PL analyses (Table S5).



SOLANUM PHYLOGENOMICS

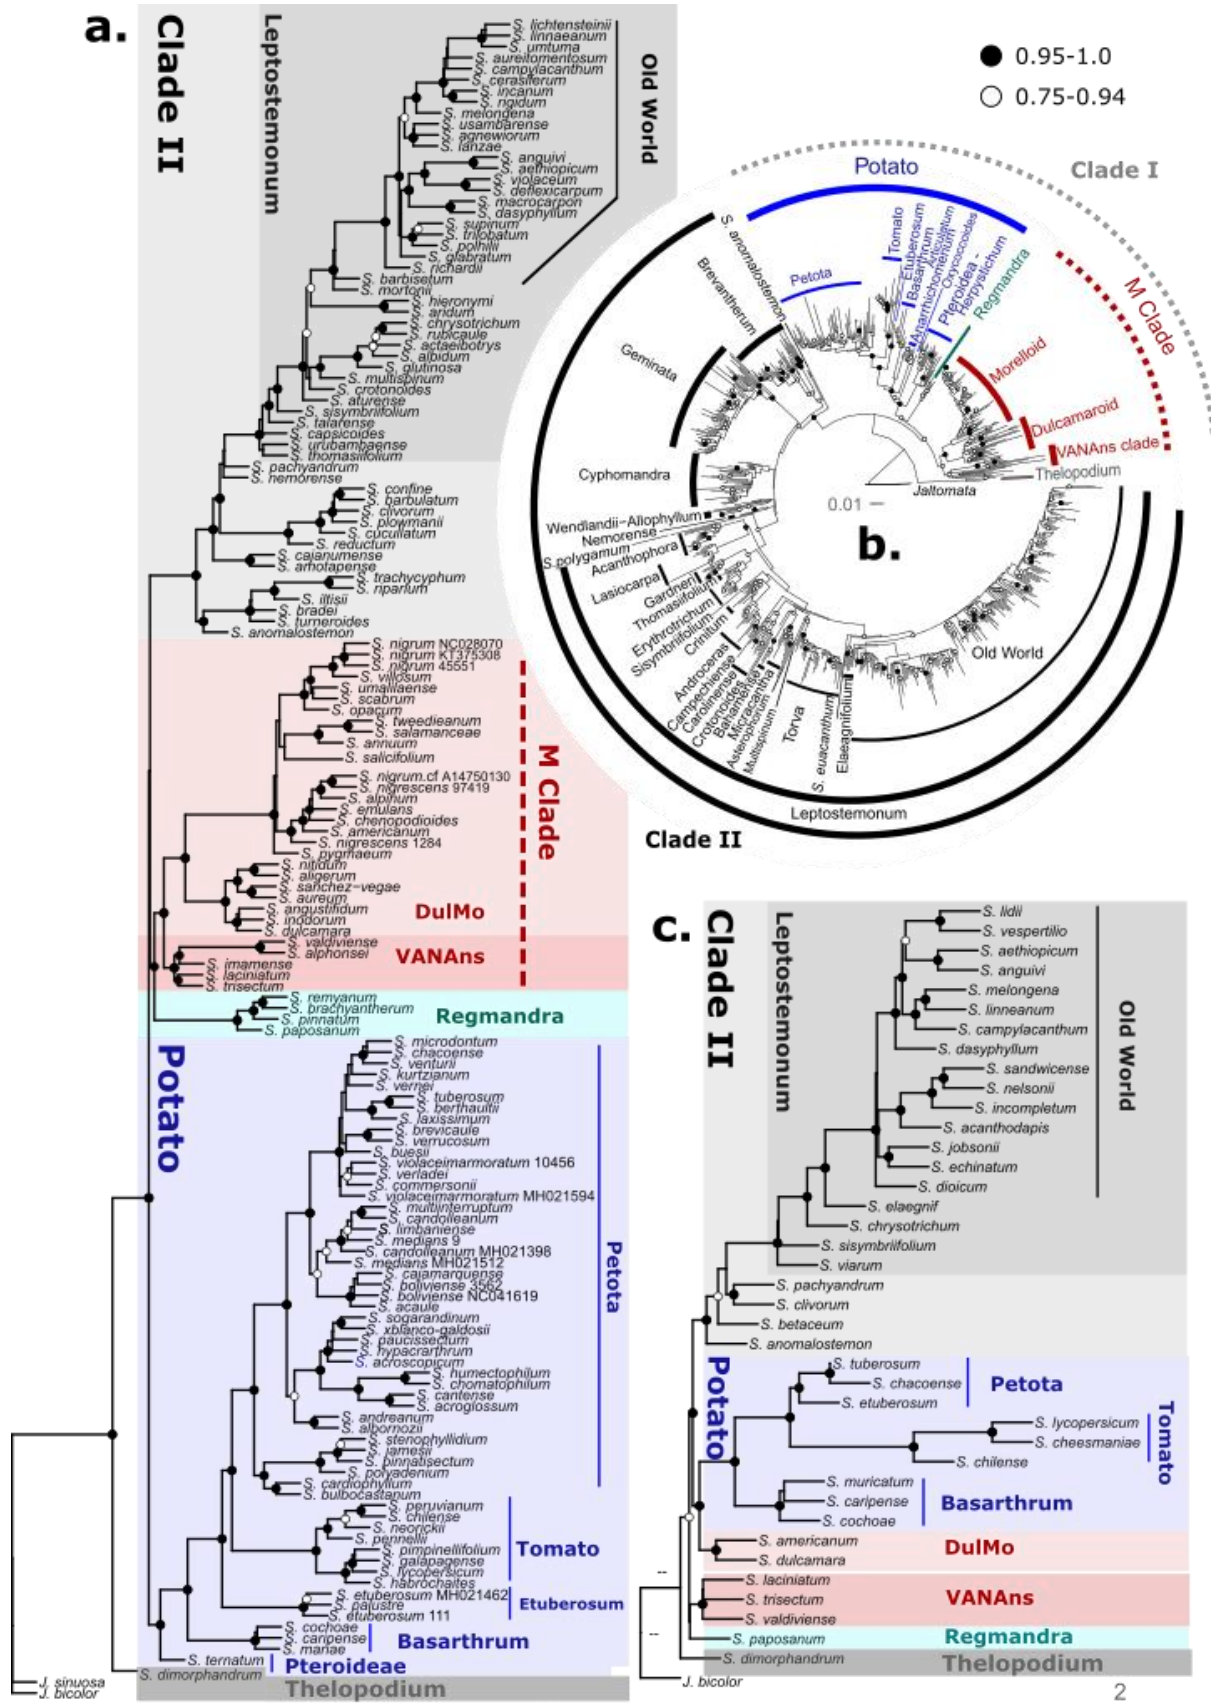

297 **FIGURE 2.** Comparison of *Solanum* clades recovered in the three different datasets. **a)** Plastome  
298 (PL) phylogeny from coalescent analysis (ASTRAL) with 151 samples representing 140  
299 *Solanum* species based on 160 loci representing exons, introns and intergenic regions. **b)**  
300 Supermatrix phylogeny from Maximum Likelihood analysis (RaxML) of 742 *Solanum* species  
301 based on two nuclear and seven plastid regions. **c)** Nuclear TC phylogeny with 40 species from  
302 coalescent analysis (ASTRAL) where a minimum of 20 taxa per loci threshold was used (min20,  
303 303 loci included). Clades are shown in the same colour in all three phylogenies to enable  
304 comparison. Branch support values are colour coded (bootstrap values in B, local posterior  
305 probability values in A and C): black = strong (0.95–1.0), white = moderate to weak support  
306 (0.75–0.94). Scale bars = substitutions/site. *Jaltomata* taxa were used as the outgroup to root all  
307 the three phylogenies. Dashed lines indicate clades from the supermatrix analysis that were not  
308 recovered in both the TC and PL analyses. Collection or Genbank numbers are indicated in the  
309 PL phylogeny for duplicate species sampled in the phylogenetic tree.

310

311 Finally, while the BI and ML supermatrix phylogeny resolved the morphologically  
312 unusual *S. anomalostemon* S.Knapp & M.Nee as sister to the rest of Clade II (BS 95%, PP 1.0),  
313 PL analyses supported *S. anomalostemon*+*Brevantherum* Clade as the first branching lineage  
314 within Clade II with high branch support (>90% for 27/40 PL trees; Fig. 2; Table S5). The  
315 *Brevantherum* Clade was not included in the TC analyses preventing a strict comparison. Within  
316 the *Leptostemonum* Clade, the Old World Clade is strongly supported with some exceptions:  
317 while most analyses showed the *Elaeagnifolium* Clade as sister to the Old World Clade (Fig. 2),  
318 ten PL analyses resolved the *Elaeagnifolium* Clade as nested within the Old World Clade (e.g.,  
319 PL ASTRAL intron only dataset and PL SVDquartets analyses of all plastome data; Table S5).

## SOLANUM PHYLOGENOMICS

320 There are also some differences between species closely related to the Eggplant clade and  
321 Anguivi grade, involving *S. campylacanthum* Hochst. ex A.Rich., *S. melongena* L., *S.*  
322 *linnaeanum* Hepper & P.-M.LJaeger, *S. dasyphyllum* Schum. & Thonn. and *S. aethiopicum* L.  
323 (Fig. 2., Fig. S1-9).

### 324 *Discordance Analyses*

325 *Principal coordinate analysis.* – The PCoA analysis (Fig. 1b-c) showed that all TC  
326 species trees were clearly separated from other species trees along the first and second axes in  
327 rooted and unrooted tree space (Fig. 1b-c). Trees derived from the supermatrix dataset were  
328 nested within the 40 PL species trees, the latter being spread more widely across the tree space  
329 (Fig. 1b-c).

330 Within datasets, species trees obtained with different phylogenetic methods are spread  
331 across the tree space, in line with the variety of different topologies observed between major  
332 clades and described above. Some weak clustering of PL topologies analysed using different  
333 methods was observed along the second axis (ML vs. coalescent; Fig. 1b-c). No clustering based  
334 on partitioning strategy or data sampling (151 vs. 125 taxa) was observed in PL dataset, or  
335 number of included loci in the TC dataset (min 4, 10 and 20; Fig. 1b-c).

336 *Concordance factors.* – Phylogenomic discordance was generally high across the PL and  
337 TC topologies, with gCF values >50% in only three nodes in the PL phylogeny (*Solanum* as a  
338 whole, *S. chilense* (Dunal) Reiche + *S. lycopersicum* L. or the Tomato Clade, and *S. hieronymi*  
339 Kuntze + *S. aridum* Morong in the Leptostemonum Clade; Fig. 3a). Elsewhere, gCF fell to 36%  
340 and below (16 nodes with gCF values 10% and below), with the lowest values found near branch  
341 nodes that varied the most amongst the different reconstructed species trees. This included the

342 node subtending Regmandra (gCF 1%, SCF 42%; Fig. 3a), and that positioning Regmandra +  
343 DulMo + VANans Clade as sister to Clade II (gCF 4%, SCF 33%). Similarly, low gCF and  
344 uninformative sCF values around 33% were found across Clade II, including the node placing *S.*  
345 *hieronymi* + *S. aridum* as sister to the Elaeagnifolium + Old World minor clades (gCF 6 %, sCF  
346 34 %; Fig. 3a), as well as the placement of *S. capsicoides*, a representative of the Acanthophora  
347 lineage within Leptostemonum (gCF 7%, sCF 36%; Fig. 3a). Not all nodes with low gCF values  
348 <10% showed uninformative sCF values: for example, the node subtending the grouping of *S.*  
349 *chrysotrichum* Schltld., *S. multispinum* N.E.Br., and *S. crotonoides* Lam. has a gCF value of 4%,  
350 but an sCF value of 51%. The close relationship amongst these three taxa, representing the  
351 Torva, Multispinum, and Crotonoides Clades respectively, is found in all species trees that  
352 included these taxa (Fig. S1-S7).

353         Across the TC phylogeny, gCF and SCF values were slightly higher on average, with six  
354 nodes presenting values >50% for both metrics: four within the Petota Clade, one at the base of  
355 the Leptostemonum Clade (gCF 64%, SCF 73%; Fig. 3a), and another at the base of the Old  
356 World Clade within Leptostemonum (gCF 58%, SCF 75%; Fig. 3a). Five nodes had low gCF  
357 values of >10% or less, with again some of the lowest values located near the base of the tree,  
358 such as the relationship of Regmandra as sister to the VANans Clade (gCF 3%, sCF 39%; Fig.  
359 3a), or placement of Potato as sister to the DulMo Clade (gCF 10%, sCF 41%; Fig. 3a), and the  
360 relationship of the Potato Clade + DulMo Clade as sister to Clade II (gCF 4%, sCF 41%; Fig.  
361 3a).

362         *Network analyses and polytomy tests.* – The filtered supertree network showed three large  
363 polytomies in the TC ASTRAL topology (Fig. 3b) corresponding to areas where incongruence  
364 was detected based on visual comparison (Fig. 1b-c) and low gCF and sCF values (Fig. 3a):

## SOLANUM PHYLOGENOMICS

365 along the backbone (i) of *Solanum*, (ii) of the Leptostemonum Clade, and (iii) of the Old World  
366 Clade. These polytomies showed almost no boxed edges (i.e., reticulations) indicating lack of,  
367 rather than conflict in, signal (Fig. 3b). The same three polytomies were visible in the PL  
368 ASTRAL topology, with more boxed edges indicating conflict in signal (Fig. 3c).

369 The polytomy tests carried out for the three TC ASTRAL datasets resulted in 10 nodes  
370 each for which the null hypothesis of branch lengths equal to zero was accepted, suggesting they  
371 should be collapsed into polytomies (Fig. S11a,c,e); these nodes subtended the Regmandra  
372 Clade, and also suggested polytomies located within the VANAns Clade and Clade II, and at the  
373 crown nodes of the Leptostemonum Clade and Old World Clade. In two cases, a polytomy was  
374 detected at the base of the Tomato Clade (min 4 and min 10 datasets), and at the base of the  
375 Etuberosum + Petota + Tomato Clade (min 20 dataset). Repeating the analysis by collapsing  
376 nodes with <75% local PP support led to the collapse of 12 to 13 nodes across the analyses, most  
377 of them affecting the same clades as in the previous runs, but also leading to the collapse of the  
378 crown node of the *Solanum* clade. The effective number of gene trees was too low when nodes  
379 with <75% local PP support were collapsed to carry out the test for two nodes subtending *S.*  
380 *betaceum* Cav. and *S. anomalostemon*, most likely related to the low number of genes recovered  
381 for *S. betaceum* (Table S3).

382 For the PL dataset, only the results from collapsing branches with <10% in local PP  
383 support are reported (Fig. S10g) because collapsing branches with <75% local PP support  
384 resulted in the effective number of gene trees being too low to carry out the test across most of  
385 the nodes of the species trees (Fig. S10h). The polytomy tests for the PL ASTRAL topology  
386 resulted in a total number of 69 nodes across *Solanum* where the null hypothesis was accepted.  
387 With these nodes collapsed, the resulting topology included a polytomy between Regmandra,

388 Potato, M Clade, and Clade II. Polytomies were also detected at the base of Clade II, as well as  
 389 the Leptostemonum, Old World, Morelloid, Petota, and VANAns Clades (Fig. S10g).

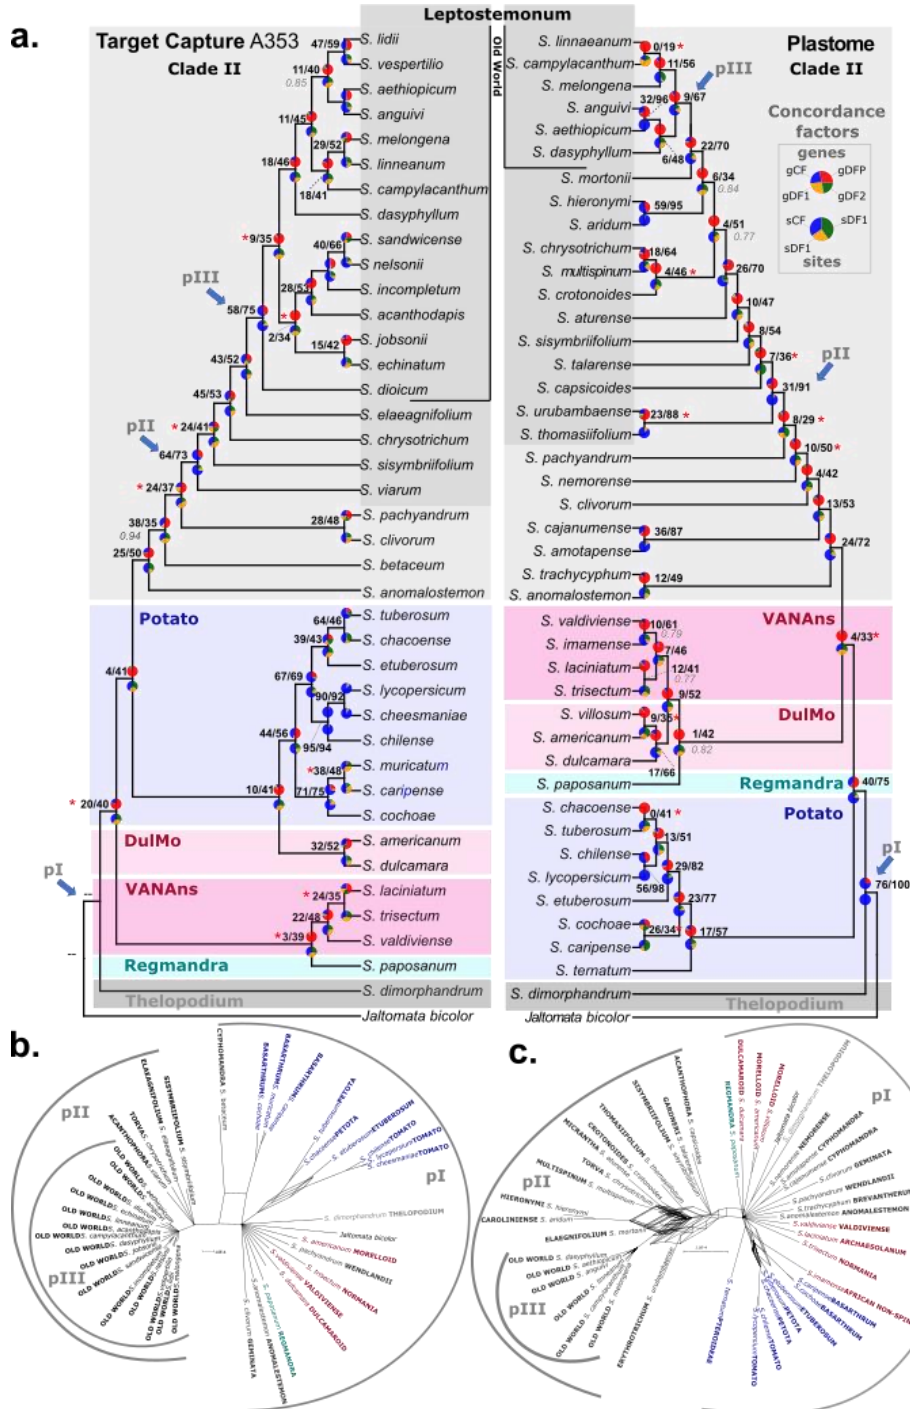

390

## SOLANUM PHYLOGENOMICS

391 **Figure 3.** Discordance analyses within and between the plastome (PL) and target capture (TC)  
392 phylogenomic datasets across *Solanum*. **a)** Rooted TC (left) and PL (right) ASTRAL  
393 phylogenies with gene concordance factor (gCF) and site concordance factor (sCF) values shown  
394 as pie charts, above and below each node respectively; plastome topology is based on analysis of  
395 all plastomes (151 samples pruned to 43 to facilitate comparison), including exons, introns and  
396 intergenic regions; and target capture topology is based on the analysis of 40 species with a  
397 minimum threshold of 20 taxa per loci. For gCF pie charts, blue represents proportion of gene  
398 trees concordant with that branch (gCF), green is proportion of gene trees concordant for 1<sup>st</sup>  
399 alternative quartet topology (gDF1), yellow support for 2<sup>nd</sup> alternative quartet topology (gDF2),  
400 and red is the gene discordance support due to polyphyly (gDFP). For the sCF pie charts: blue  
401 represents proportion of concordance across sites (sCF), green support for 1<sup>st</sup> alternative  
402 topology (quartet 1), and yellow support for 2<sup>nd</sup> alternative topology (quartet 2) as averaged over  
403 100 sites. Percentages of gCF and sCF are given above branches, in bold. Branch support (local  
404 posterior probability) values  $\geq 0.95$  are not shown, between 0.75 and 0.94 are shown in italic  
405 grey, and nodes with support values below 0.75 are shown with asterisks (\*); double-dash (--)  
406 indicates that the branch support was unavailable due to rooting of the phylogenetic tree. The  
407 nodes corresponding to the three main polytomies identified in the filtered supertree network  
408 (see b and c below) are identified in blue. **b)** Filtered supertree network of the TC dataset (40  
409 taxa, min20) based on 303 gene trees with a 50% minimum tree threshold. **c)** Filtered supertree  
410 network of the PL dataset based on 160 genes trees (exon, intron, and intergenic regions) with a  
411 50% minimum tree threshold. The three main polytomies discussed in the text are identified by  
412 arcs (pI, pII and pIII).

413 DISCUSSION

414 *Phylogenomic Discordance in Solanum*

415 Our analyses, despite increasing taxon sampling to 60% of *Solanum* species in the  
416 supermatrix analyses and providing the first comprehensive PL and TC phylogenies for the  
417 genus, did not help resolve any of the polytomies detected in previous phylogenetic studies  
418 (Särkinen et al. 2013). While the same major and minor clades are resolved consistently within  
419 and between all datasets (except for the Mapiiriense-Clandestinum Clade), clear discordance both  
420 within and between plastid and nuclear phylogenomic datasets is evident in *Solanum*. The PcoA  
421 (Fig. 1b-c) showed striking differences in the species trees generated using different  
422 phylogenomic datasets (TC versus the PL). The diversity of topologies within datasets was not  
423 strongly influenced by the phylogenetic reconstruction method employed but is likely linked to  
424 the repeated short branches along the phylogenetic backbone in *Solanum*, due to low levels of  
425 informative characters across our analyses for these nodes. Our analyses support high levels of  
426 phylogenomic discordance in both TC and PL topologies, with relatively low gCF and sCF  
427 values across both datasets. Large key polytomies were identified in the network analysis of the  
428 TC and PL datasets at different evolutionary depths, at the base of : (i) *Solanum*, in relation with  
429 the emergence of all the major clades, (ii) the largest *Solanum* lineage, the Leptostemonum  
430 Clade, and (iii) the species-rich Old World Clade (Fig. 3b,c). Polytomy tests confirmed that  
431 multiple nodes within these polytomies should be collapsed, lending weight to the idea that these  
432 are hard polytomies within the genus *Solanum*.

433 Phylogenomic discordance has been discovered in many plant lineages mainly at order or  
434 family level (e.g., Morales-Briones et al. 2021; Smith et al. 2015). Our study differs from  
435 previous studies in highlighting widespread discordance within a large genus both within and



## SOLANUM PHYLOGENOMICS

436 between nuclear and plastome phylogenomic datasets at different evolutionary depths. The  
437 strong gene-tree discordance pattern we found along the backbone of *Solanum* contrasts sharply  
438 with results obtained from other mega-diverse angiosperm genera, such as *Carex* (Cyperaceae),  
439 where low gCF and sCF values were recovered in only two nodes along the backbone  
440 (Villaverde et al. 2020).

441         Interpreting the exact nature of the three main regions of discordance discovered here  
442 needs careful consideration, because distinguishing between processes such as gene flow, ILS,  
443 and hybridisation can be difficult at different evolutionary depths. The more recently diverged  
444 Leptostemonum Clade is by far the most species-rich clade in *Solanum* (approximately 566  
445 currently recognised species) and contains the Old World Clade, the most rapidly diversifying  
446 lineage within *Solanum* (Echeverría-Londoño et al. 2020). The low gCF percentages observed in  
447 both the Leptostemonum and Old World Clade could be attributed to ILS due to rapid  
448 diversification; alternatively, the pattern could be explained by gene flow amongst populations  
449 and species. Similar patterns of strong discordance along the backbone of more recently diverged  
450 clades in Solanaceae such as the rapidly evolving Australian *Nicotiana* section *Suaveolentes*  
451 have been detected using the Angiosperms353 bait set (Dodsworth et al. 2020). Custom-designed  
452 baits that incorporate faster evolving and less universally conserved genes (Soto Gomez et al.  
453 2018) or expansion of the number of loci sampled using a RAD-Seq approach show promise  
454 here (Chase et al., submitted). There are, however, examples where both custom-designed baits  
455 (Larridon et al. 2020) and whole-genome sequencing approaches do not provide more resolved  
456 phylogenetic trees; these cases are due to (i) ancient hybridization events (Morales-Briones et al.  
457 2021) and/or (ii) rapid radiation and substantial gene-flow amongst species, such as has been  
458 shown in tomatoes (Pease et al. 2016), eggplants (Page et al. 2019), and cichlids (Malkinsky et

459 al. 2018; Matschiner et al. 2020). Given the discordance patterns observed here, both processes  
460 are likely in the case of *Solanum*.

461         The deeper polytomy along the backbone of *Solanum* is more difficult to interpret  
462 because the older age of the node means extinction has had more time to affect the observed  
463 pattern (Louca and Pennell 2020). The gene discordance observed along the backbone, combined  
464 with the extremely short branches subtending the early diverging lineages in *Solanum*, could be  
465 attributed to several phenomena, such as ILS caused by events of elevated diversification rates,  
466 gene flow, hybridisation, or polyploidy, as has been argued elsewhere to explain the  
467 phylogenetic incongruence patterns observed in some of the early-diverging lineages of  
468 mammals (Simion et al. 2017), Neoaves (Suh, 2016), Amaranthaceae s.l. (Morales-Briones et al.  
469 2021) and the Leguminosae (Koenen et al. 2020a, b). High speciation rates in early diverging  
470 lineages of *Solanum* have not been detected in diversification-rate studies (Echeverría-Londoño  
471 et al. 2020), which may not be surprising given the debate surrounding the accuracy of current  
472 methods for estimating diversification rates (Louca and Pennell 2020). Studies of key  
473 morphological traits across the entire *Solanum* phylogeny have had difficulty in pinpointing  
474 distinct synapomorphies that would clearly establish the relationships amongst the clades (Bohs  
475 2005). Whilst there is a three-fold increase in genome size between the distantly related potato  
476 (*S. tuberosum* L., Potato Clade) and eggplant (*S. melongena*, Leptostemonum Clade; Barchi et al.  
477 2019), there is currently no conclusive evidence for genome duplication along the backbone of  
478 *Solanum*. This is supported by the almost complete absence of paralogs detected in the TC  
479 dataset, save for one locus. Species trees from the TC, PL, and supermatrix do not suggest any  
480 obvious events of chloroplast capture or introgression. Chromosome counts indicate that the  
481 ancestor of *Solanum* was diploid with a large majority of *Solanum* species reported to be diploid

## SOLANUM PHYLOGENOMICS

482 (>97% of the 506 species for which chromosome counts are available; Chiarini et al. 2018).  
483 Mapping of polyploidy across the phylogeny indicates that most of the early branching lineages  
484 of *Solanum* are diploid (e.g., Regmandra, and most clades within VANAns and Potato clade  
485 [except the Petota Clade itself]) and that polyploids have risen independently within the  
486 Archaeosolanum, Petota, and Morelloid Clades, and three minor clades within the larger  
487 Leptostemonum Clade (Chiriani et al. 2018). In contrast, little is known about genome size and  
488 chromosome content evolution, with only 62 *Solanum* species recorded in the plant DNA C-  
489 value database (Pellicer and Leitch 2019), and 86 species studied with chromosome banding  
490 and/or FISH techniques (Chiarini et al. 2018). A broader taxon and genomic sampling will be  
491 needed to confidently exclude major roles for introgression, hybridisation, and polyploidy on the  
492 observed gene-tree discordance, and to determine whether the processes causing discordance  
493 change at different evolutionary depths across the phylogenetic tree (Knowles et al. 2018).

### 494 *Is There A Single Bifurcating "Truth"?*

495 The idea that "well-supported and fully bifurcating" phylogenies are a requisite for  
496 evolutionary studies is built on the premise that such trees are the accurate way of representing  
497 evolution. Only a limited set of methods exist for inferring non-bifurcating evolutionary  
498 relationships and trait evolution (Than et al. 2008; Solís-Lemus et al. 2017; Wen et al. 2018), and  
499 they are usually limited to fewer than 30 taxa due to their computational intensity (Cao et al.  
500 2019, BioRxv). The shift in systematics from "tree "- to "bush "-like thinking, where polytomies  
501 and non-reticulate patterns of evolution are considered as acceptable or real (Poczai 2013; Mallet  
502 et al. 2016; Edelman et al. 2019), comes from the accumulation of studies finding similar  
503 unresolvable phylogenetic nodes, despite using different large-scale genomic sampling strategies  
504 and various analytical methods (Suh 2016). Discordances have been shown in several groups of

505 Solanaceae, *Nicotiana* (Dodsworth et al. 2020), the Capsiceae (*Capsicum* and relatives, Spalink  
506 et al. 2018), subtribe Iochrominae (Gates et al. 2018), *Jaltomata* (Wu et al. 2019), tomato and its  
507 wild relatives (Strickler et al. 2015; Pease et al. 2016), and potatoes (Huang et al. 2019). Our  
508 study, which focuses on relationships across *Solanum*, suggests this pattern is widespread in the  
509 family and adds to evidence supporting the prevalence of phylogenomic discordance in plants at  
510 both shallow and deeper phylogenetic depths (see for instance Wickett et al. 2014; Collier-Zans  
511 2015; Sun et al. 2015; Folk et al. 2017; Crowl et al. 2017; Lane et al. 2018, Morales-Briones et  
512 al. 2018; Walker et al. 2019; Charr et al. 2020; Dupin et al. 2020; Stull et al. 2020).

513         The discordance discovered here does not affect the previously identified infrageneric  
514 groupings of *Solanum* and our analyses demonstrate that the major and minor clades are stable  
515 (e.g., Weese and Bohs 2007; Särkinen et al. 2013). The new supermatrix phylogeny that includes  
516 60% of the extant species in the genus is a significant advance for building a detailed  
517 understanding of trait evolution across the genus, but the prevalence of hard polytomies has  
518 important implications for researchers interested in trait evolution and historical biogeography,  
519 as it has been argued that standard methods of trait evolution may incorrectly infer how traits  
520 evolve (Hahn and Nakhleh 2016). The discordance between traits, gene trees, and species trees  
521 has been defined as hemiplasy (Avice and Robinson 2008), and studies have shown that  
522 depending on the level of ILS present in the data, it can lead to different interpretations of  
523 convergent evolution of traits across a phylogenetic tree (Mendes et al. 2016). Our understanding  
524 of trait change will likely be advanced through additional in-depth phylogenomic studies in the  
525 group, as we try to link population-level evolutionary processes to patterns generated at a macro-  
526 evolutionary scale (e.g., Pease et al. 2016; Page et al. 2019). Scaling up these approaches to  
527 understand evolution of traits across large clades such as *Solanum* will not only require more

## SOLANUM PHYLOGENOMICS

528 genomic data, but also filling in some basic natural history knowledge gaps, such as genome size  
529 and chromosome structure, which are poorly known for lineages such as the *Thelopodium* and  
530 *Regmandra* Clade and for species that are not close relatives of major commercial crops such as  
531 eggplant, tomato or potato. To address these challenges, continued efforts and field work will be  
532 required, as seed collections are required to provide high quality material for chromosome  
533 studies and accurate measures of genome sizes (but see Viruel et al. 2019). Acknowledging and  
534 embracing the uncertainty that underlies hard polytomies is crucial if we are to design research  
535 programs aimed at understanding the biology of large and rapidly radiating lineages.

### 536 SUPPLEMENTARY MATERIALS

537 Data available from the Dryad Digital Repository: [http://dx.doi.org/10.5061/dryad.\[NNNN\]](http://dx.doi.org/10.5061/dryad.[NNNN]).

538 Scripts used in the analyses and for the production of figures will be made available at  
539 [https://github.com/edgagnon/Solanum\\_Phylogenomics](https://github.com/edgagnon/Solanum_Phylogenomics)

### 540 FUNDING

541 This work was supported by the Fonds de recherche du Québec en Nature et  
542 Technologies postdoctoral fellowship and a grant from the Department of Biological Sciences of  
543 the University of Moncton to EG, the Sibbald Trust fellowship to RH, the Ceiba Foundation to  
544 AO, CNPq Conselho Nacional de Desenvolvimento Científico e Tecnológico awards  
545 479921/2010-54 and 427198/2016-0 and Coordenação de Aperfeiçoamento de Pessoal de Nível  
546 Superior CAPES/FAPESPA award 88881.159124/2017-01 to LLG, NSF through grant DEB-  
547 0316614 “PBI Solanum: a worldwide treatment” to SK and LB, the Calleva Foundation &  
548 Sackler Trust (Plant and Fungal Trees of Life Project at Kew), the LUOMUS Trigger Fund to  
549 PP, and the OECD CRP Grant. Field sampling was supported by the Northern Territory

550 Herbarium and the David Burpee Endowment at Bucknell University (Australia), and National  
551 Geographic Society Northern Europe Award GEFNE49-12 (Peru, TS). Peruvian specimens were  
552 collected and sequenced under the permission of Ministerio de Agricultura, Dirección General  
553 Forestal y de Fauna Silvestre (collection permits 084-2012-AG-DGFFSDGGEFFS and 096-2017-  
554 SERFOR/DGGSPFFS, and genetic resource permit 008-2014-MINAGRI-DGFFS/DGEFFS).

#### 555 ACKNOWLEDGEMENTS

556 We thank Elliot Gardner for sharing scripts and advice on phylogenomic analyses with  
557 HybPiper, Royce Steeves for providing advice on DNA extraction for genome skimming, Felix  
558 Forest and Olivier Maurin for providing technical support and providing feedback on the  
559 manuscript, and João R. Stehmann, Thais Almeida, Paul Gonzáles, and Maria Baden who greatly  
560 contributed to fieldwork and sample acquisition.

#### 561 AUTHOR CONTRIBUTIONS

562 EG designed and performed the analyses of the paper, with guidance from PP, AO, SD  
563 and TS; EG produced all figures, and wrote the article, with major contributions from TS, and  
564 PP, SD, SK and XA. RH and TS helped in data gathering and analyses. All other authors  
565 contributed data to the main analyses. All authors read and contributed to the final version of the  
566 manuscript.

#### 567 LITERATURE CITED

568 1KP (One Thousand Plant Transcriptomes Initiative). 2019. One thousand plant  
569 transcriptomes and the phylogenomics of green plants. *Nature* 574: 679-685.

## SOLANUM PHYLOGENOMICS

570 APG (Angiosperm Phylogeny Group). 1998. An ordinal classification for the families of  
571 flowering plants. *Ann. Mo. Bot. Gard.* 85: 531–553.

572 Avise J.C., Robinson T.J. 2008. Hemiplasy: a new term in the lexicon of  
573 phylogenetics. *Syst. Biol.* 57(3): 503–507.

574 Barchi L., Pietrella M., Venturini L., Minio A., Toppino L., et al. 2019. A chromosome-  
575 anchored eggplant genome sequence reveals key events in Solanaceae evolution. *Sci. Rep.* 9:  
576 11769.

577 Bohs L. 2005. Major clades in *Solanum* based on *ndhF* sequence data. In: Keating R.C.,  
578 Hollowell V.C., Croat T.B., editors. *A festschrift for William G. D'Arcy: the legacy of a*  
579 *taxonomist*. St. Louis: Missouri Botanical Garden Press. p. 27–49.

580 Cao Z., Liu X., Ogilvie H.A., Yan Z., Nakhleh L. 2019. Practical Aspects of  
581 Phylogenetic Network Analysis Using PhyloNet. [bioRxiv 746362](https://doi.org/10.1101/746362); doi: /10.1101/746362

582 Charr J-C, Garavito A, Guyeux C, Cruzillat D, Descombes P, Fournier C, Ly SN,  
583 Raharimalala EN, Rakotomalala J-J, Stoffelen P, et al. 2020. Complex evolutionary history of  
584 coffees revealed by full plastid genomes and 28,800 nuclear SNP analyses, with particular  
585 emphasis on *Coffea canephora* (Robusta coffee). *Mol Phylogenet Evol.* 151:106906.

586 Chiarini F., Sazatornil F., Bernardello G. 2018. Data reassessment in a phylogenetic  
587 context gives insight into chromosome evolution in the giant genus *Solanum* (Solanaceae).  
588 *System. Biodiver.* 16(4): 397-416.

589 Chifman J., Kubatko L. 2014. Quartet inference from SNP data under the coalescent  
590 model. *Bioinformatics* 30: 3317–3324.

- 591 Chou J., Gupta A., Yaduvanshi S., Davidson R., Nute M., Mirarab S., Warnow T. 2015.  
592 A comparative study of SVDquartets and other coalescent-based species tree estimation  
593 methods. BMC Genomics 16: S2, doi: /10.1186/1471-2164-16-S10-S2
- 594 Collier-Zans E. 2015. Recombination in the chloroplasts of the florally diverse Andean  
595 subtribe Iochrominae (Solanaceae). Undergraduate Honours Thesis, University of Colorado  
596 Boulder, USA
- 597 Crowl A.A., Myers C., Cellinese N. 2017. Embracing discordance: Phylogenomic  
598 analyses provide evidence for allopolyploidy leading to cryptic diversity in a Mediterranean  
599 *Campanula* (Campanulaceae) clade. Evolution 71(4): 913-922. doi: 10.1111/evo.13203.
- 600 Degnan J.H., Rosenberg N.A. 2009. Gene-tree discordance, phylogenetic inference and  
601 the multispecies coalescent. Trends Ecol. Evol. 24(6): 332–340.
- 602 Dodsworth S., Christenhusz M.J.M., Conran J.G., Guignard M.S., Knapp S., Struebig M.,  
603 Leitch A.R., Chase M.W. 2020. Extensive plastid-nuclear discordance in a recent radiation  
604 of *Nicotiana* section *Suaveolentes* (Solanaceae). Bot. J. Linn. Soc. 193(4): 546–559.
- 605 Dupin J, Raimondeau P, Hong-Wa C, Manzi S, Gaudeul M, Besnard G. 2020. Resolving  
606 the Phylogeny of the Olive Family (Oleaceae): Confronting information from organellar and  
607 nuclear genomes. Genes. 11(12). doi:10.3390/genes11121508.  
608 <http://dx.doi.org/10.3390/genes11121508>.
- 609 Duvall M.R., Burke S.V., Clark D.C. 2020. Plastome phylogenomics of Poaceae:  
610 alternate topologies depend on alignment gaps. Bot. J. Linn. Soc. 192(1): 9–20.



## SOLANUM PHYLOGENOMICS

- 611 Echeverría-Londoño S., Särkinen T., Fenton I.S., Purvis A., Knapp S. 2020. Dynamism  
612 and context-dependency in diversification of the megadiverse plant genus *Solanum* (Solanaceae).  
613 *J. Syst. Evol* 58(6): 767-782, <https://doi.org/10.1111/jse.12638>.
- 614 Edelman NB, Frandsen PB, Miyagi M, Clavijo B, Davey J, Dikow RB, García-Accinelli  
615 G, Van Belleghem SM, Patterson N, Neafsey DE, et al. 2019. Genomic architecture and  
616 introgression shape a butterfly radiation. *Science*. 366(6465):594–599.
- 617 Edgar R.C. 2010. USEARCH v.11. Search and clustering orders of magnitude faster than  
618 BLAST. *Bioinformatics* 26(19): 2460–2461.
- 619 Gates D.J., Pilson D., Smith S.D. 2018. Filtering of target sequence capture individuals  
620 facilitates species tree construction in the plant subtribe Iochrominae (Solanaceae). *Mol.*  
621 *Phylogenet. Evol.* 123: 26–34.
- 622 Gonçalves D.J.P., Jansen R.K., Ruhlman T.A., Mandel J.R. 2020. Under the rug:  
623 Abandoning persistent misconceptions that obfuscate organelle evolution. *Mol. Phylogenet.*  
624 *Evol.* 151:106903. doi: 10.1016/j.ympcv.2020.106903.
- 625 Gonçalves D.J.P., Simpson B.B., Shimizu G.H., Jansen R.K., Ortiz E.M. 2019. Genome  
626 assembly and phylogenomic data analyses using plastid data: Contrasting species tree estimation  
627 methods. *Data Brief* 25: 104271. doi: 10.1016/j.dib.2019.104271
- 628 Hahn M.W., Nakhleh, L. 2016. Irrational exuberance for resolved species trees.  
629 *Evolution* 70: 7–17. doi: 10.1111/evo.12832.
- 630 Hardigan M.A., Laimbeer F.P.E., Newton L., Crisovan E., J.P. Hamilton, B.  
631 Vaillancourt, K. Wiegert-Rininger, Wood J.C., Douches D.S., Farré E.M., Veilleux R.E., Buell

- 632 C.R. 2017. Genome diversity of tuber-bearing *Solanum* uncovers complex evolutionary history  
633 and targets of domestication in the cultivated potato. *Proc. Natl. Acad. Sci. U.S.A.* 114(46):  
634 E9999–E10008. doi: 10.1073/pnas.1714380114
- 635 Hime P.M., Lemmon A.R., Lemmon E.C.M., Prendini E., Brown J.M., Thomson R.C.,  
636 Kratovil J.D., Noonan B.P., Pyron R.A., Peloso P.L.V., Kortyna M.L., Keogh J.S., Donnellan  
637 S.C., Mueller R.L., Raxworthy C.J., Kunte K., Ron S.R., Das S., Gaitonde N., Green D.M.,  
638 Labisko J., Che J., Weisrock D.W. 2020 [2021]. Phylogenomics reveals ancient gene-tree  
639 discordance in the amphibian tree of life. *Syst. Biol.* 70(1): 49-66, doi: 10.1093/sysbio/syaa034
- 640 Huang B., H. Ruess H., Liang Q., Colleoni C., Spooner D.M. 2019. Analyses of 202  
641 plastid genomes elucidate the phylogeny of *Solanum* section *Petota*. *Sci. Rep.* 9: 4454. doi:  
642 /10.1038/s41598-019-40790-5
- 643 Huson D.H., Bryant D. 2006. Application of phylogenetic networks in evolutionary  
644 studies. *Mol. Biol. Evol.* 23(2): 254-267.
- 645 Jeffroy O., Brinkmann H., Delsuc F., Philippe H. 2006. Phylogenomics: the beginning of  
646 incongruence? *Trends. Genet.* 22(4): 225–231.
- 647 Johnson M.G., Gardner E.M., Liu Y., Medina R., Goffinet B., Shaw A.J., Zerega N.J.C.,  
648 Wickett N.J. 2016. HybPiper: Extracting coding sequence and introns for phylogenetics from  
649 high-throughput sequencing reads using target enrichment. *Appl. Plant. Sci.* 4: 1600016. doi:  
650 [10.3732/apps.1600016](https://doi.org/10.3732/apps.1600016)
- 651 Johnson M.G., Pokorny L., Dodsworth S., Botigué L.R., Cowan R.S., Devault A.,  
652 Eiserhardt L.W., Epiawalage N., Forest F., Kim J.T., Leebens-Mack J.H., Leitch I.J., Maurin O.,

SOLANUM PHYLOGENOMICS

- 653 Soltis D.E., Soltis P.S., Wong G.K., Baker W.J., Wickett N.J. 2019. A universal probe set for  
654 targeted sequencing of 353 nuclear genes from any flowering plant designed using k-Medoids  
655 clustering. *Syst. Biol.* 68(4): 594–606. doi: 10.1093/sysbio/syy086
- 656 Jombart T., Kendall M., Almagro-Garcia J., Colijn C. 2017. Treespace: statistical  
657 exploration of landscapes of phylogenetic trees. *Mol. Ecol. Resour.* 17: 1385–1392. doi:  
658 10.1111/1755-0998.12676
- 659 Kendall M., Colijn C. 2016. Mapping phylogenetic trees to reveal distinct patterns of  
660 evolution. *Mol. Biol. Evol.* 33(10): 2735–2743.
- 661 Knowles L.L., Huang H., Sukumaran J., Smith S.A. 2018. A matter of phylogenetic  
662 scale: Distinguishing incomplete lineage sorting from lateral gene transfer as the cause of gene  
663 tree discord in recent versus deep diversification histories. *Am. J. Bot.* 105: 376-384.
- 664 Koenen E.J.M., Ojeda D.I., Steeves R., Migliore J., Bakker F.T., Wieringa J.J., Kidner  
665 C., Hardy O.J., Pennington R.T., Bruneau A., Hughes C.E. 2020a. Large - scale genomic  
666 sequence data resolve the deepest divergences in the legume phylogeny and support a near -  
667 simultaneous evolutionary origin of all six subfamilies. *New Phytol.* 225: 1355-1369. doi :  
668 10.1111/nph.16290
- 669 Koenen E.J.M., Ojeda D.I., Bakker F.T., Wieringa J.J., Kidner C., Hardy O.J.,  
670 Pennington R.T., Herendeen P.S., Bruneau A., Hughes C.E. 2020b. The origin of the legumes is  
671 a complex paleopolyploid phylogenomic tangle closely associated with the Cretaceous–  
672 Paleogene (K–Pg) mass extinction event. *Syst. Biol.* syaa041. doi: [10.1093/sysbio/syaa041](https://doi.org/10.1093/sysbio/syaa041)

- 673 Kumar S, Filipinski AJ, Battistuzzi FU, Kosakovsky Pond SL, Tamura K. 2012. Statistics  
674 and truth in phylogenomics. *Mol Biol Evol.* 29(2):457–472.
- 675 Kuramae E.E., Robert V., Snel B., Weiß M., Boekhout T. 2006. Phylogenomics reveal a  
676 robust fungal tree of life. *FEMS Yeast Res.* 6(8): 1213–1220. doi: 10.1111/j.1567-  
677 1364.2006.00119.x
- 678 Lane AK, Augustin MM, Ayyampalayam S, Plant A, Gleissberg S, Di Stilio VS,  
679 Depamphilis CW, Wong GK-S, Kutchan TM, Leebens-Mack JH. 2018. Phylogenomic analysis  
680 of Ranunculales resolves branching events across the order. *Bot J Linn Soc.* 187(2):157–166.
- 681 Larridon I, Villaverde T, Zuntini AR, Pokorny L, Brewer GE, Epiawalage N, Fairlie I,  
682 Hahn M, Kim J, Maguilla E, et al. 2019. Tackling rapid radiations with targeted sequencing.  
683 *Front. Plant Sci.* 10:1655.
- 684 Levin R.A., Myers N.R., Bohs L. 2006. Phylogenetic relationships among the 'spiny  
685 solanums' (*Solanum* subgenus *Leptostemonum*, Solanaceae). *Am. J. Bot.* 93: 157–169.
- 686 Li Y., Colleoni C., Zhang J., Liang Q., Hu Y., Ruess H., Simon R., Liu Y., Liu H., Yu G.,  
687 Schmitt E., Ponitzki C., Liu G., Huang H., Zhan F., Chen L., Huang Y., Spooner D., Huang B.  
688 2018. Genomic analyses yield markers for identifying agronomically important genes in potato.  
689 *Mol. Plant* 11(3): 473–484. doi: 10.1016/j.molp.2018.01.009
- 690 Liu L., Yu L., Kubatko L., Pearl D.K., Edwards S.V. 2009. Coalescent methods for  
691 estimating phylogenetic trees. *Mol. Phylogenet. Evol.* 53(1): 320–328.
- 692 Louca S., Pennell MW. 2020. Extant timetrees are consistent with a myriad of  
693 diversification histories. *Nature* 580: 502-505, doi: 10.1038/s41586-020-2176-1

SOLANUM PHYLOGENOMICS

- 694 Malinsky M, Svardal H, Tyers AM, Miska EA, Genner MJ, Turner GF, Durbin R. 2018.  
695 Whole-genome sequences of Malawi cichlids reveal multiple radiations interconnected by gene  
696 flow. *Nat Ecol Evol.* 2(12):1940–1955.
- 697 Mallet J, Besansky N, Hahn MW. 2016. How reticulated are species? *Bioessays.*  
698 <https://onlinelibrary.wiley.com/doi/abs/10.1002/bies.201500149>.
- 699 Matschiner M, Böhne A, Ronco F, Salzburger W. 2020. The genomic timeline of cichlid  
700 fish diversification across continents. *Nat Commun.* 11(1):5895.
- 701 Mendes F.K., Hahn Y., Hahn M.W. 2016. Gene-tree discordance can generate patterns of  
702 diminishing convergence over time. *Mol. Biol. Evol.* 33(12): 3299–3307, doi:  
703 10.1093/molbev/msw197
- 704 Minh B.Q., Schmidt H.A., Chernomor O., Schrempf D., Woodhams M.D., von Haeseler  
705 A., Lanfear R. 2020a. IQ-TREE 2: new models and efficient methods for phylogenetic inference  
706 in the genomic era. *Mol. Biol. Evol.* 37(5): 1530–1534. doi: 10.1093/molbev/msaa015
- 707 Minh B.Q., Hahn M.W., Lanfear R. 2020b. New methods to calculate concordance  
708 factors for phylogenomic datasets. *Mol. Biol. Evol.* 37(9): 2727–2733. doi:  
709 10.1093/molbev/msaa106.
- 710 Morgan C.C., Foster P.G., Webb A.E., Pisani D., McInerney J.O., O'Connell MJ. 2013.  
711 Heterogeneous models place the root of the placental mammal phylogeny. *Mol. Biol. Evol.* 30:  
712 2145–2156.
- 713 Morales-Briones DF, Kadereit G, Tefarikis DT, Moore MJ, Smith SA, Brockington SF,  
714 Timoneda A, Yim WC, Cushman JC, Yang Y. 2021. Disentangling sources of gene tree

715 discordance in phylogenomic data sets: Testing ancient hybridizations in Amaranthaceae s.l. *Syst*  
716 *Biol.* 70(2):219–235.

717 Morales-Briones DF, Liston A, Tank DC. 2018. Phylogenomic analyses reveal a deep  
718 history of hybridization and polyploidy in the Neotropical genus *Lachemilla* (Rosaceae). *New*  
719 *Phytol.* 218(4):1668–1684.

720 Page A, Gibson J, Meyer RS, Chapman MA. 2019. Eggplant domestication: Pervasive  
721 gene flow, feralization, and transcriptomic divergence. *Mol Biol Evol.* 36(7):1359–1372.

722 Pease J.B., Haak D.C., Hahn M.W., Moyle L.C. 2016. Phylogenomics reveals three  
723 sources of adaptive variation during a rapid radiation. *PLoS Biol.* 14(2): e1002379. doi:  
724 10.1371/journal.pbio.1002379

725 Pellicer J., Leitch I.J. 2020. The Plant DNA C - values database (release 7.1): an updated  
726 online repository of plant genome size data for comparative studies. *New Phytol.* 226: 301–305.  
727 doi : 10.1111/nph.16261

728 Philippe H., Vienne D.M. de, Ranwez V., Roure B., Baurain D., Delsuc F. 2017. Pitfalls  
729 in supermatrix phylogenomics. *Eur. J. Taxon.* 283. doi : 10.5852/ejt.2017.283

730 Philippe H., Brinkmann H., Lavrov D.V., Littlewood D.T.J., Manuel M., Wörheide G.,  
731 Baurain D. 2011. Resolving difficult phylogenetic questions: why more sequences are not  
732 enough. *PLoS Biol.* 9(3): e1000602. doi: 10.1371/journal.pbio.1000602

733 Poczai P. 2013. To network or not to network that is the question. *J. Genet.* 92: 703–705.  
734 doi: 10.1007/s12041-013-0293-4

SOLANUM PHYLOGENOMICS

- 735           Robinson D.F., Foulds L.R. 1981. Comparison of phylogenetic trees. *Math. Biosci.* 53(1–  
736 2): 131-147.
- 737           Romiguier J., Ranwez V., Delsuc F., Galtier N., Douzery E.J. 2013. Less is more in  
738 mammalian phylogenomics: AT-rich genes minimize tree conflicts and unravel the root of  
739 placental mammals. *Mol. Biol. Evol.* 30: 2134–2144.
- 740           Ronco F., Matschiner M., Böhne A., Boila A., Büscher H.H., El Taher A., Indermaur A.,  
741 Malinsky M., Ricci V., Kahmen A., Jentoft S., Salzburger W. 2021. Drivers and dynamics of a  
742 massive adaptive radiation in cichlid fishes. *Nature* 589: 76-81, doi: 10.1038/s41586-020-2930-  
743 4
- 744           Saarela J.M., Burke S.V., Wysocki W.P., Barrett M.D., Clark L.G., Craine J.M., Peterson  
745 P.M., Soreng R.J., Vorontsova M.S., Duvall M.R. 2018. A 250 plastome phylogeny of the grass  
746 family (Poaceae): topological support under different data partitions. *PeerJ* 6: e4299. doi:  
747 /10.7717/peerj.4299
- 748           Särkinen T., Bohs L., Olmstead R.G., Knapp S. 2013. A phylogenetic framework for  
749 evolutionary study of the nightshades (Solanaceae): a dated 1000-tip tree. *BMC Evol. Biol.* 13:  
750 214. doi: 10.1186/1471-2148-13-214
- 751           Sayyari E., Mirarab S. 2018. Testing for polytomies in phylogenetic species trees using  
752 quartet frequencies. *Genes* 9(3): 132. doi: 10.3390/genes9030132.
- 753           Simion P., Philippe H., Baurain D., Jager M., Richter D.J., Di Franco A., Roure B., Satoh  
754 N., Queindec E., Ereskovsky A., Lapebie P. 2017. A large and consistent phylogenomic dataset  
755 supports sponges as the sister group to all other animals. *Curr. Biol.* 27: 958–967.

- 756 Smith S.D., Pennell M.W., Dunn C.W., Edwards S.V. 2020. Phylogenetics is the New  
757 Genetics (for Most of Biodiversity). *Trends Ecol. Evol.* 35(5): 415-425. doi:  
758 10.1016/j.tree.2020.01.005.
- 759 Smith SA, Moore MJ, Brown JW, Yang Y. 2015. Analysis of phylogenomic datasets  
760 reveals conflict, concordance, and gene duplications with examples from animals and plants.  
761 *BMC Evol Biol.* 15:150.
- 762 Solís-Lemus C., P. Bastide, C. Ané. 2017. PhyloNetworks: a package for phylogenetic  
763 networks. *Mol. Biol. Evol.* 34(12): 3292–3298. doi: 10.1093/molbev/msx235.
- 764 Soto Gomez M, Pokorny L, Kantar MB, Forest F, Leitch IJ, Gravendeel B, Wilkin P,  
765 Graham SW, Viruel J. 2019. A customized nuclear target enrichment approach for developing a  
766 phylogenomic baseline for *Dioscorea* yams (Dioscoreaceae). *Appl Plant Sci.* 7(6):e11254.
- 767 Spalink D., Stoffel K., Walden G.K., Hulse-Kemp A.M., Hill T.A., Van Deynze A., Bohs  
768 L. 2018. Comparative transcriptomics and genomic patterns of discordance in Capsiceae  
769 (Solanaceae). *Mol. Phylogenet. Evol.* 126: 293–302. doi: 10.1016/j.ympev.2018.04.030.
- 770 Stern S., Agra M.F. de, Bohs L. 2011. Molecular delimitation of clades within New  
771 World species of "spiny solanums" (*Solanum* subg. *Leptostemonum*). *Taxon* 60: 1429–1441.
- 772 Strickler S.R., Bombarely A., Munkvold J.D., York T., Menda N., Martin G.B., Mueller  
773 L.A. 2015. Comparative genomics and phylogenetic discordance of cultivated tomato and close  
774 wild relatives. *PeerJ* 3: e793. doi: 10.7717/peerj.793



## SOLANUM PHYLOGENOMICS

- 775           Stull GW, Soltis PS, Soltis DE, Gitzendanner MA, Smith SA. 2020. Nuclear  
776 phylogenomic analyses of asterids conflict with plastome trees and support novel relationships  
777 among major lineages. *Am J Bot.* 107(5):790–805.
- 778           Suh A., Smeds L., Ellegren H. 2015. The dynamics of incomplete lineage sorting across  
779 the ancient adaptive radiation of neoavian birds. *PLoS Biol.* 13: e1002224.
- 780           Suh A. 2016. The phylogenomic forest of bird trees contains a hard polytomy at the root  
781 of Neoaves. *Zool. Scr.* 45: 50–62.
- 782           Than C., Ruths D., Nakhleh L. 2008. PhyloNet: a software package for analyzing and  
783 reconstructing reticulate evolutionary relationships. *BMC Bioinformatics* 9: 322. doi:  
784 10.1186/1471-2105-9-322
- 785           Tepe E.J., Anderson G.J., Spooner D.M., Bohs L. 2016. Relationships among wild  
786 relatives of the tomato, potato, and pepino. *Taxon* 65: 262–276.
- 787           Villaverde T, Jiménez-Mejías P, Luceño M, Waterway MJ, Kim S, Lee B, Rincón-  
788 Barrado M, Hahn M, Maguilla E, Roalson EH, Hipp AL, THE GLOBAL CAREX GROUP.  
789 2020. A new classification of *Carex* (Cyperaceae) subgenera supported by a HybSeq backbone  
790 phylogenetic tree. *Bot. J. Linn. Soc.* 194(2): 141–163.
- 791           Viruel J, Conejero M, Hidalgo O, Pokorny L, Powell RF, Forest F, Kantarm MB, et al.  
792 2019. A target capture-based method to estimate ploidy from herbarium specimens. *Front. Plant*  
793 *Sci.* 10: 937.

- 794 Walker J.F., Walker-Hale N., Vargas O.M., Larson D.A., Stull G.W. 2019.  
795 Characterizing gene tree conflict in plastome-inferred phylogenies. PeerJ 7: e7747. doi:  
796 10.7717/peerj.7747
- 797 Weese T.L., Bohs L. 2007. A three-gene phylogeny of the genus *Solanum* (Solanaceae).  
798 Syst. Bot. 32: 445–463.
- 799 Wen D., Yu Y., Zhu J., Nakhleh L. 2018. Inferring phylogenetic networks using  
800 PhyloNet. Syst. Biol. 67(4): 735–740. doi: 10.1093/sysbio/syy015
- 801 Wendel J.F., Doyle J.J. 1998. Phylogenetic incongruence: window into genome history  
802 and molecular evolution. In: Soltis D.E., Soltis, P.S. Doyle J.J. (eds.) Molecular systematics of  
803 plants II: DNA sequencing. Boston: Springer, 265-296.
- 804 Wickett N.J., Mirarab S., Nguyen N., Warnow T., Carpenter E., Matasci N.,  
805 Ayyampalayam S., Barker M.S., Burleigh J.G., Gitzendanner M.A., Ruhfel B.R., Wafula E., Der  
806 J.P., Graham S.W., Mathews S., Melkonian M., Soltis D.E., Soltis P.S., Miles N.W., Rothfels  
807 C.J., Pokorny L., Shaw A.J., DeGironimo L., Stevenson D.W., Surek B., Villarreal J.C., Roure  
808 B., Philippe H., Pamphilis C.W. de, Chen T., x Deyholos T., Baucom R.S., Kutchan T.M.,  
809 Augustin M.M., Wang J., Zhang Y., Tian Z., Yan Z., Wu X., Sun X., Wong G.K., Leebens-Mack  
810 J. 2014. Phylotranscriptomic analysis of the origin and early diversification of land plants. Proc.  
811 Natl. Acad. Sci. U.S.A. 111 (45): E4859-E4868. doi: 10.1073/pnas.1323926111
- 812 Wu M., Kostyun J.L., Moyle L.C. 2019. Genome sequence of *Jaltomata* addresses rapid  
813 reproductive trait evolution and enhances comparative genomics in the hyper-diverse  
814 Solanaceae. Genome Biol. Evol. 11(2): 335–349.

## SOLANUM PHYLOGENOMICS

- 815            Zhang C., Rabiee M., Sayyari E., Mirarab S. 2018. ASTRAL-III: Polynomial time  
816 species tree reconstruction from partially resolved gene trees. *BMC Bioinformatics* 19(S6): 153.  
817 doi: 10.1186/s12859-018-2129-y.

SUPPLEMENTARY INFORMATION

**Supplementary Material and Methods**

**Table S1.** Supermatrix sample information, including voucher details and Genbank numbers for sequences used.

\*\*\* (All sequences submitted, save for three).

**Table S2.** Plastome (PL) sample information, including voucher details and plastome assemblies results. Total length, as well as length for the long-single copy region (LSC), the short-single copy region (SSC) and the two inverted repeat regions (IR1 and IR2) is shown; statistics of mean coverage per base pair and standard deviation are also provided.

\*\*\* (Submission in progress in Genbank).

**Table S3.** Target capture (TC) sample information, including voucher details and sequence recovery statistics. The number of reads (NumReads), the number of reads mapped to the targets (ReadsMapped), the percentage of reads on target (PctOnTarget), the number of genes with reads (GenesMapped), the number of genes with contigs (GenesWithContigs), (GenesWithSeqs\_, GenesAt25pct, GenesAt50pct, GenesAt75pct, GenesAt150pct, and the number of genes with paralog warnings (ParalogWarnings) is shown.

**Table S4.** Statistics for plastome alignments. Data shows number of sequences, trimming mode, the number of loci retained for coalescent analysis after checking for excessive gene tree branch lengths, alignment length, number of informative and constant sites, pairwise identity, average GC content, percentage of gaps, and average locus length for the exon, intron and intergenic regions.

|                                          | <b>Exons (ex)</b> |                 | <b>Introns (in)</b> |                 | <b>Intergenic (it)</b> |                 | <b>Combined plastome (al)</b> |                  |
|------------------------------------------|-------------------|-----------------|---------------------|-----------------|------------------------|-----------------|-------------------------------|------------------|
|                                          |                   |                 |                     |                 |                        |                 |                               |                  |
| <b>Number of taxa</b>                    | 151               | 125             | 151                 | 125             | 151                    | 125             | 151                           | 125              |
| <b>Trimming mode</b>                     | visual            | visual          | visual              | visual          | strict (trimAl)        | strict (TrimAl) | strict & visual               | strict & visual  |
| <b>Total sites</b>                       | 64,117            | 64,117          | 15,881              | 15,881          | 51,358                 | 51,358          | 131,356                       | 131,356          |
| <b>Parsimony informative sites</b>       | 3,561<br>(5.6%)   | 3,197<br>(4.9%) | 1,496<br>(9.4%)     | 1,364<br>(8.6%) | 4,309<br>(8.4%)        | 3,984<br>(7.7%) | 9,359<br>(7.1%)               | 8,545<br>(6.5%)  |
| <b>Constant sites</b>                    | 56,604<br>(88%)   | 57,665<br>(90%) | 12,864<br>(81%)     | 13,187<br>(83%) | 42,024<br>(82%)        | 42,898<br>(84%) | 111,523<br>(85%)              | 113,731<br>(87%) |
| <b>Pairwise identity (%)</b>             | 94                | 99              | 90                  | 98              | 90                     | 97              | 91                            | 97               |
| <b>Average GC content (%)</b>            | 38.8              | 38.8            | 34.7                | 34.6            | 35.6                   | 35.4            | 37.1                          | 36.8             |
| <b>Gaps (%)</b>                          | 4                 | 2               | 14                  | 10              | 6                      | 2               | 6.5                           | 10               |
| <b>Average locus length</b>              | 823               | 823             | 1,058               | 1,058           | 740                    | 740             | 816                           | 816              |
| <b>Loci retained for ASTRAL analysis</b> | 76                | 76              | 15                  | 15              | 69                     | 69              | 160                           | 160              |

GAGNON ET AL.

**Table S5.** Comparison of branch support values for monophyly and sister relationships of key clades and species in *Solanum*, across the 48 species trees. Branch support for maximum likelihood (RaxML and IQ-TREE) and SVDQuartet analyses are bootstrap support values in percentages, and for ASTRAL analyses are in local posterior probability values. Focus is given on monophyly and relationships between main clades in *Solanum* mentioned in the text. Abbreviations used in the phylogenetic analyses follow figure 1 in the main text: ex=exon, in=intron, it=intergenic region. Branch support  $\geq 50$  bootstrap (BS) and  $\geq 0.5$  posterior probability values are shown and colour coded: black =  $\geq 95$  BS/0.95 PP; dark grey = 75-94 BS/0.75-0.94 PP; light grey = 50-74 BS/0.5-0.74 PP. NA indicates nodes that were not tested due to taxon sampling. \* excluding *Thelopodium* Clade; \*\* excluding *S. anomalostemon*; \*\*\* includes *Pterioidea* Clade in ASTRAL intron trees with partial and full plastomes (151 species); \*\*\*\* excludes *S. virginianum* in some analyses of TC dataset with low min. loci threshold.

**Table S6.** Supermatrix alignment details, with details about the nine regions selected for this study. Number of species sampled per region, accumulative percentage of species sampled per region, aligned length, proportions of parsimony informative characters (PI), and variable sites (VS) per region in the dataset are indicated. Values are calculated with outgroups, and with ambiguous regions and repeats excluded. bp=base pairs.

| <b>Region</b>           | <b>Genome</b>        | <b>Species<br/>(% of<br/>total)</b> | <b>%<br/>of<br/>total</b> | <b>Aligned<br/>length<br/>before<br/>exclusion<br/>(bp)</b> | <b>Excluded<br/>bp</b> | <b>Aligned<br/>length<br/>after<br/>exclusion<br/>(bp)</b> | <b>PI</b> | <b>PI<br/>of<br/>total<br/>(%)</b> | <b>VS</b> | <b>VS<br/>of<br/>total<br/>(%)</b> |
|-------------------------|----------------------|-------------------------------------|---------------------------|-------------------------------------------------------------|------------------------|------------------------------------------------------------|-----------|------------------------------------|-----------|------------------------------------|
| <i>trnT-L</i>           | Plastid              | 622                                 | 84                        | 2,077                                                       | 164                    | 1,913                                                      | 593       | 31                                 | 928       | 45                                 |
| <b>ITS</b>              | Nuclear<br>ribosomal | 609                                 | 82                        | 881                                                         | 355                    | 526                                                        | 352       | 67                                 | 465       | 88                                 |
| <b>waxy</b>             | Nuclear              | 532                                 | 72                        | 1,792                                                       | 81                     | ,711                                                       | 923       | 54                                 | 1,195     | 70                                 |
| <i>trnS-G</i>           | Plastid              | 334                                 | 45                        | 932                                                         | 141                    | 791                                                        | 173       | 22                                 | 330       | 42                                 |
| <i>ndhF</i>             | Plastid              | 261                                 | 35                        | 2,088                                                       | 0                      | 2,088                                                      | 344       | 16                                 | 581       | 28                                 |
| <i>ndhF-<br/>rpl32</i>  | Plastid              | 261                                 | 35                        | 899                                                         | 16                     | 883                                                        | 232       | 26                                 | 404       | 46                                 |
| <i>matK</i>             | Plastid              | 242                                 | 32                        | 1,148                                                       | 0                      | 1,148                                                      | 220       | 19                                 | 409       | 36                                 |
| <i>rpL32-<br/>trnL</i>  | Plastid              | 206                                 | 27                        | 1,377                                                       | 124                    | 1,253                                                      | 282       | 23                                 | 494       | 39                                 |
| <i>psbA-<br/>trnH</i>   | Plastid              | 163                                 | 22                        | 650                                                         | 55                     | 595                                                        | 145       | 24                                 | 238       | 40                                 |
| <b>Total</b>            |                      | 746                                 | --                        | 11,844                                                      | 936                    | 10,908                                                     | 3,263     | 30                                 | 5,044     | 46                                 |
| <b>Plastid<br/>only</b> |                      | 678                                 | 91                        | 9,171                                                       | 500                    | 8,671                                                      | 1,989     | 23                                 | 3,384     | 39                                 |

**Table S7.** List of polyploid taxa in *Solanum*.

**Table S8.** Target capture (TC) alignment statistics. Loci excluded refer to the number of excluded loci based on excessively long branch lengths, and loci retained is the final number of loci retained for both ML and coalescent analyses. Empty sequences inserted refers to amount of missing data. Min = minimum; Bp = base pairs.

|                                              | <b>TC<br/>Alignment 1<br/>(min4)</b> | <b>TC<br/>Alignment 2<br/>(min10)</b> | <b>TC<br/>Alignment 3<br/>(min20)</b> |
|----------------------------------------------|--------------------------------------|---------------------------------------|---------------------------------------|
| <b>Species</b>                               | 40                                   | 40                                    | 40                                    |
| <b>Minimum number of species per locus</b>   | 4                                    | 10                                    | 20                                    |
| <b>Loci retained for ML analysis</b>         | 348                                  | 337                                   | 310                                   |
| <b>Loci excluded</b>                         | 10                                   | 7                                     | 7                                     |
| <b>Loci retained for Astral analysis</b>     | 338                                  | 330                                   | 303                                   |
| <b>Length of concatenated sequences (bp)</b> | 261,975                              | 257,519                               | 244,272                               |
| <b>Empty sequences inserted</b>              | 3,147                                | 2,781                                 | 2,092                                 |



**Table S9.** Optimal substitution model used in ML analyses for the PL and TC datasets, determined using ModelFinder in IQ-TREE2. For each loci, the number of taxa, sites, informative sites, and invariable sites are indicated, as well as the model selected and the AICc score. Worksheet titles correspond to the following: PLUnpartitioned = Models selected for PL unpartitioned datasets (exons, introns, intergenic regions and combined, for 151 taxa and 125 taxa); PLByLociEx125 = Models selected for PL exons only, 125 taxa, partitioned-by-loci; PLByLociIn125 = Models selected for PL introns only, 125 taxa, partitioned-by-loci; PLByLociIt125 = Models selected for PL intergenic regions only, 125 taxa, partitioned-by-loci; PLByLociAll125 = Models selected for PL combined regions, 125 taxa, partitioned-by-loci; PLByLociEx151 = Models selected for PL exons only, 151 taxa, partitioned-by-loci; PLByLociIn151 = Models selected for PL introns only, 151 taxa, partitioned-by-loci; PLByLociIt151 = Models selected for PL intergenic regions only, 151 taxa, partitioned-by-loci; PLByLociAll151 = Models selected for PL combined regions, 151 taxa, partitioned-by-loci; PLBestPartScheme = Models selected for PL datasets analysed according to the best-partition scheme; TcPartitioned\_Min04= Models selected for loci of the TC dataset, with minimum 4 taxa per loci; TcPartitioned\_Min10= Models selected for loci of the TC dataset, with minimum 10 taxa per loci; TcPartitioned\_Min20= Models selected for loci of the TC dataset, with minimum 20 taxa per loci.

**Figure S1.** Detailed RaxML of supermatrix phylogenetic tree with 746 taxa. Nodes with bootstrap support equal and above 95% are in cyan, and with branch support between 75% and 94% in red. Bootstrap support values for each node indicated in italic. Tips indicate species names, followed by major and/or minor clade, as indicated in Table 1.

**Figure S2.** Detailed Bayesian inference (Beast) supermatrix phylogenetic tree with 746 taxa. Nodes with posterior probability equal and above 0.95 are in cyan, and nodes with posterior probabilities between 0.75 and 0.95 are in red. Posterior probability values for each indicated in italic. Tips indicate species names, followed by major and/or minor clade, as indicated in Table 1.

**Figure S3.** ML results for each of the nine individual loci and combined plastid loci: (a) ITS ; (b) *matK*; (c) *ndhF*; (d) *ndhF-rpL32*; (e) *psbA-trnH*; (f) *rpL32-trnL*; (g) *trnL-trnT*; (h) *trnS-trnG*; (i) *waxy*; (j) seven plastid loci. Nodes with bootstrap support equal and above 95% are in cyan, and with branch support between 75% and 94% in red. Tips indicate species names, followed by major and/or minor clade, as indicated in Table 1.

**Figure S4.** BI results for each of the nine individual loci and combined plastid loci: (A) ITS ; (B) *matK*; (C) *ndhF*, (D) *ndhF-rpL32*, (E) *psbA-trnH* (F) *rpL32-trnL*; (G) *trnL-trnT*; (H) *trnS-trnG*; (I) *waxy*; (J) seven plastid loci. Nodes with posterior probability equal and above 0.95 are in cyan, and nodes with posterior probabilities between 0.75 and 0.95 are in red. Tips indicate species names, followed by major and/or minor clade, as indicated in Table 1.

**Figure S5.** ML phylogenetic trees of plastome datasets. Nodes with bootstrap support equal and above 95% are in cyan, and with branch support between 75% and 94% in red. Tips indicate species names, followed by major and/or minor clade, as indicated in Table 1. a) 151 taxa, exons only, unpartitioned; b) 125 taxa, exons only, unpartitioned; c) 151 taxa, exons only, partitioned by loci; d) 125 taxa, exons only, partitioned by loci; e) 151 taxa, exons only, best partition scheme; f) 125 taxa, exons only, best partition scheme; g) 151 taxa, Introns only, unpartitioned; h) 125 taxa, Introns only, unpartitioned; i) 151 taxa, Introns only, partitioned by loci; j) 125 taxa, Introns only, partitioned by loci; k) 151 taxa, Introns only, best partition scheme; l) 125 taxa, Introns only, best partition scheme; m) 151 taxa, intergenic regions, unpartitioned; n) 125 taxa, intergenic regions, unpartitioned; o) 151 taxa, intergenic regions, partitioned by loci; p) 125 taxa, intergenic regions, partitioned by loci; q) 151 taxa, intergenic regions, best partition scheme; r) 125 taxa, intergenic regions, best partition scheme; s) 151 taxa, all data, unpartitioned; t) 125 taxa, all data, unpartitioned; u) 151 taxa, all data, partitioned by loci; v) 125 taxa, all data, partitioned by loci; w) 151 taxa, all data, best partition scheme; x) 125 taxa, all data, best partition scheme,

**Figure S6.** ASTRAL-III phylogenetic trees of plastome datasets. Nodes with multi-locus local posterior probability support equal and above 0.95 are in cyan, and with support between 0.75 and 0.94 in red. Tips indicate species names, followed by major and/or minor clade, as indicated in Table 1. a) 151 taxa, exons only; b) 125 taxa, exons only; c) 151 taxa, introns only; d) 125 taxa, introns only; e) 151 taxa, intergenic regions; f) 125 taxa, intergenic regions; g) 151 taxa, all data; h) 125 taxa, all data.

GAGNON ET AL.

**Figure S7.** SVDquartets phylogenetic trees of plastome datasets. a) 151 taxa, exons only; b) 125 taxa, exons only; c) 151 taxa, introns only; d) 125 taxa, introns only; e) 151 taxa, intergenic regions; f) 125 taxa, intergenic regions; g) 151 taxa, all data; h) 125 taxa, all data.

**Figure S8.** ML phylogenetic trees of A353 target capture datasets (IQ-TREE2). Nodes with bootstrap support equal and above 95% are in cyan, and with branch support between 75% and 94% in red. Tips indicate species names, followed by major and/or minor clade, as indicated in Table 1. a) filtering threshold of a minimum of 4 taxa per loci; b) IQ-TREE2, filtering threshold of a minimum of 10 taxa per loci; c) filtering threshold of a minimum of 20 taxa per loci.

**Figure S9.** Coalescent phylogenetic trees of A353 target-capture datasets (ASTRAL-III). Nodes with multi-locus local posterior probability support equal and above 0.95 are in cyan, and with support between 0.75 and 0.94 in red. Tips indicate species names, followed by major and/or minor clade, as indicated in Table 1. a) filtering threshold of minimum of 4 taxa per loci; b) filtering threshold of minimum of 10 taxa per loci; c) filtering threshold of minimum of 20 taxa per loci;

**Figure S10.** Polytomy test results with ASTRAL-III. a) Target Capture A353 species tree ASTRAL-III, filtering threshold of minimum 4 taxa per loci, branches in gene trees with 10% or less branch support collapsed; b) Target Capture A353, ASTRAL-III, filtering threshold of minimum 4 taxa per loci, branches in gene trees with 75% or less branch support collapsed; c) Target Capture A353, ASTRAL-III, filtering threshold of minimum 10 taxa per loci, branches in gene trees with 10% or less branch support collapsed; d) Target Capture A353, ASTRAL-III, filtering threshold of minimum 10 taxa per loci, branches in gene trees with 75% or less branch support collapsed; e) Target Capture A353, ASTRAL-III, filtering threshold of minimum 20 taxa per loci, branches in gene trees with 10% or less branch support collapsed; f) Plastome, All Data, ASTRAL-III, 151 taxa, branches in gene trees with 10% or less branch support collapsed; g) Plastome, All Data, ASTRAL-III, 151 taxa, branches in gene trees with 75% or less branch support collapsed;

## Datasets

**File1:** Newick treefile, with all 48 species trees (TreeBase)

**File2:** Newick treefile, with all 48 species trees pruned to 27 taxa (TreeBase).

**File3:** Alignment file of concatenated Sanger supermatrix, with partition between genes (746 taxa).

**File4:** Plastome Exons, Introns only, Intergenic regions used in phylogenetic analyses, 151 taxon alignment;

**File5.** Target Capture A353 alignments of 338 loci, filtering threshold of minimum 4 taxa per loci;

**File6.** Target Capture A353 alignments of 330 loci, filtering threshold of minimum 10 taxa per loci;

**File7.** Target Capture A353 alignments of 303 loci, filtering threshold of minimum 20 taxa per loci;

## SCRIPTS

(Are being deposited in Github, in progress)

Rscripts for producing figures

Beast xml file

Scripts for Astral analyses

Scripts for IQtree analyses

Scripts for SVDQuartet analyses

Scripts for gCF and sCF calculations

## Scripts for Polytomy tests
